# Supplementary material for: On the origin of universal cell shape variability in confluent epithelial monolayers
Source: eLife journal article supplement (doi:10.7554/elife.76406), 2022-12-23
Supplement: supp [file elife-76406-supp-v1.zip]

Archive with 8 entries (8 files):
- elife_poa_e76406_Transparent_Reporting_File.pdf
- elife_poa_e76406_Figure_2_figure_supplement_1.pdf
- elife_poa_e76406_Figure_2_figure_supplement_2.pdf
- elife_poa_e76406_Figure_2_figure_supplement_3.pdf
- elife_poa_e76406_Figure_2_figure_supplement_4.pdf
- elife_poa_e76406_Figure_3_figure_supplement_1.pdf
- elife_poa_e76406_Figure_3_figure_supplement_2.pdf
- elife_poa_e76406_Figure_4_figure_supplement_1.pdf
