# Supplementary figures and images for: On the origin of universal cell shape variability in confluent epithelial monolayers
Source: eLife journal article supplement (doi:10.7554/elife.76406), 2022-12-23

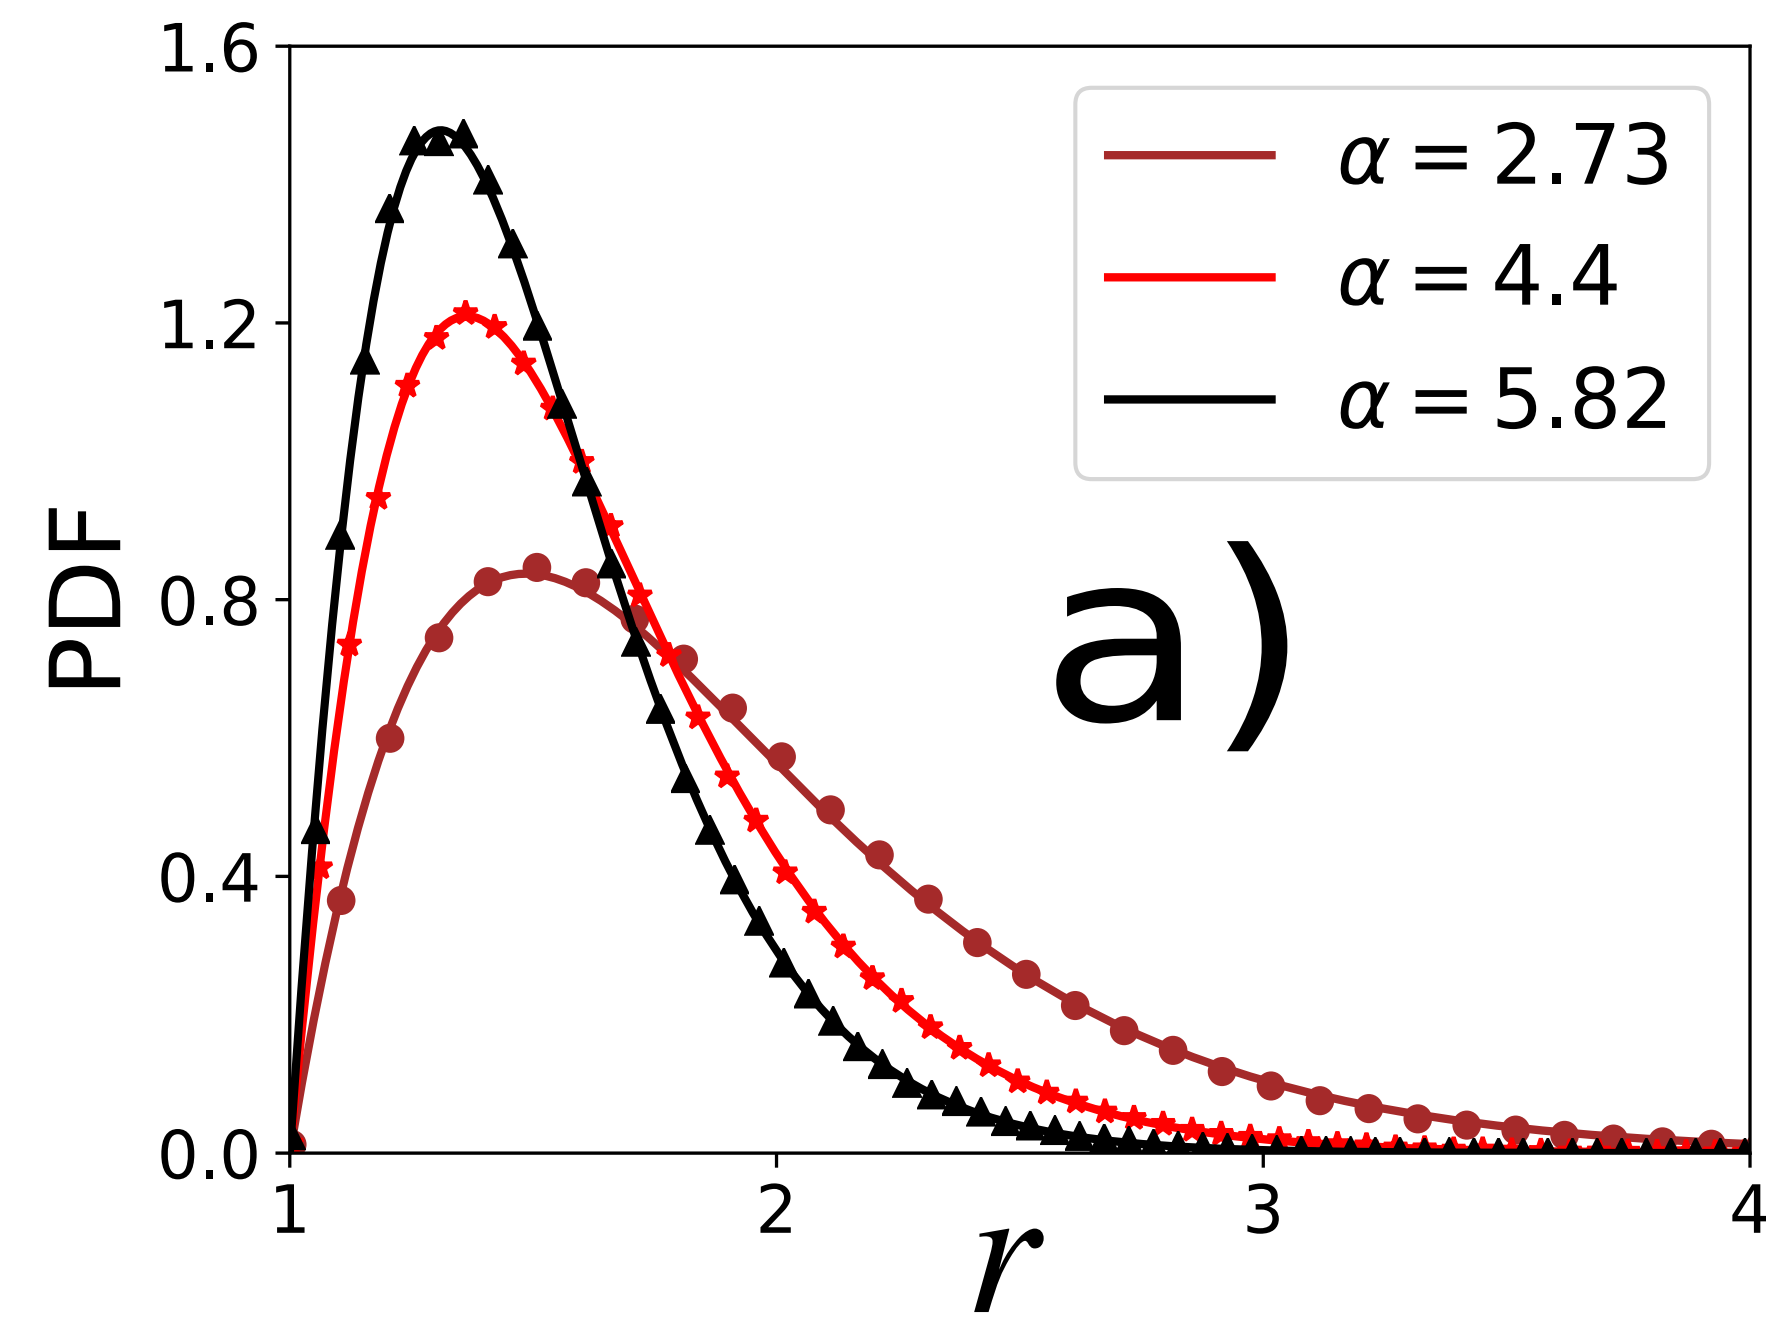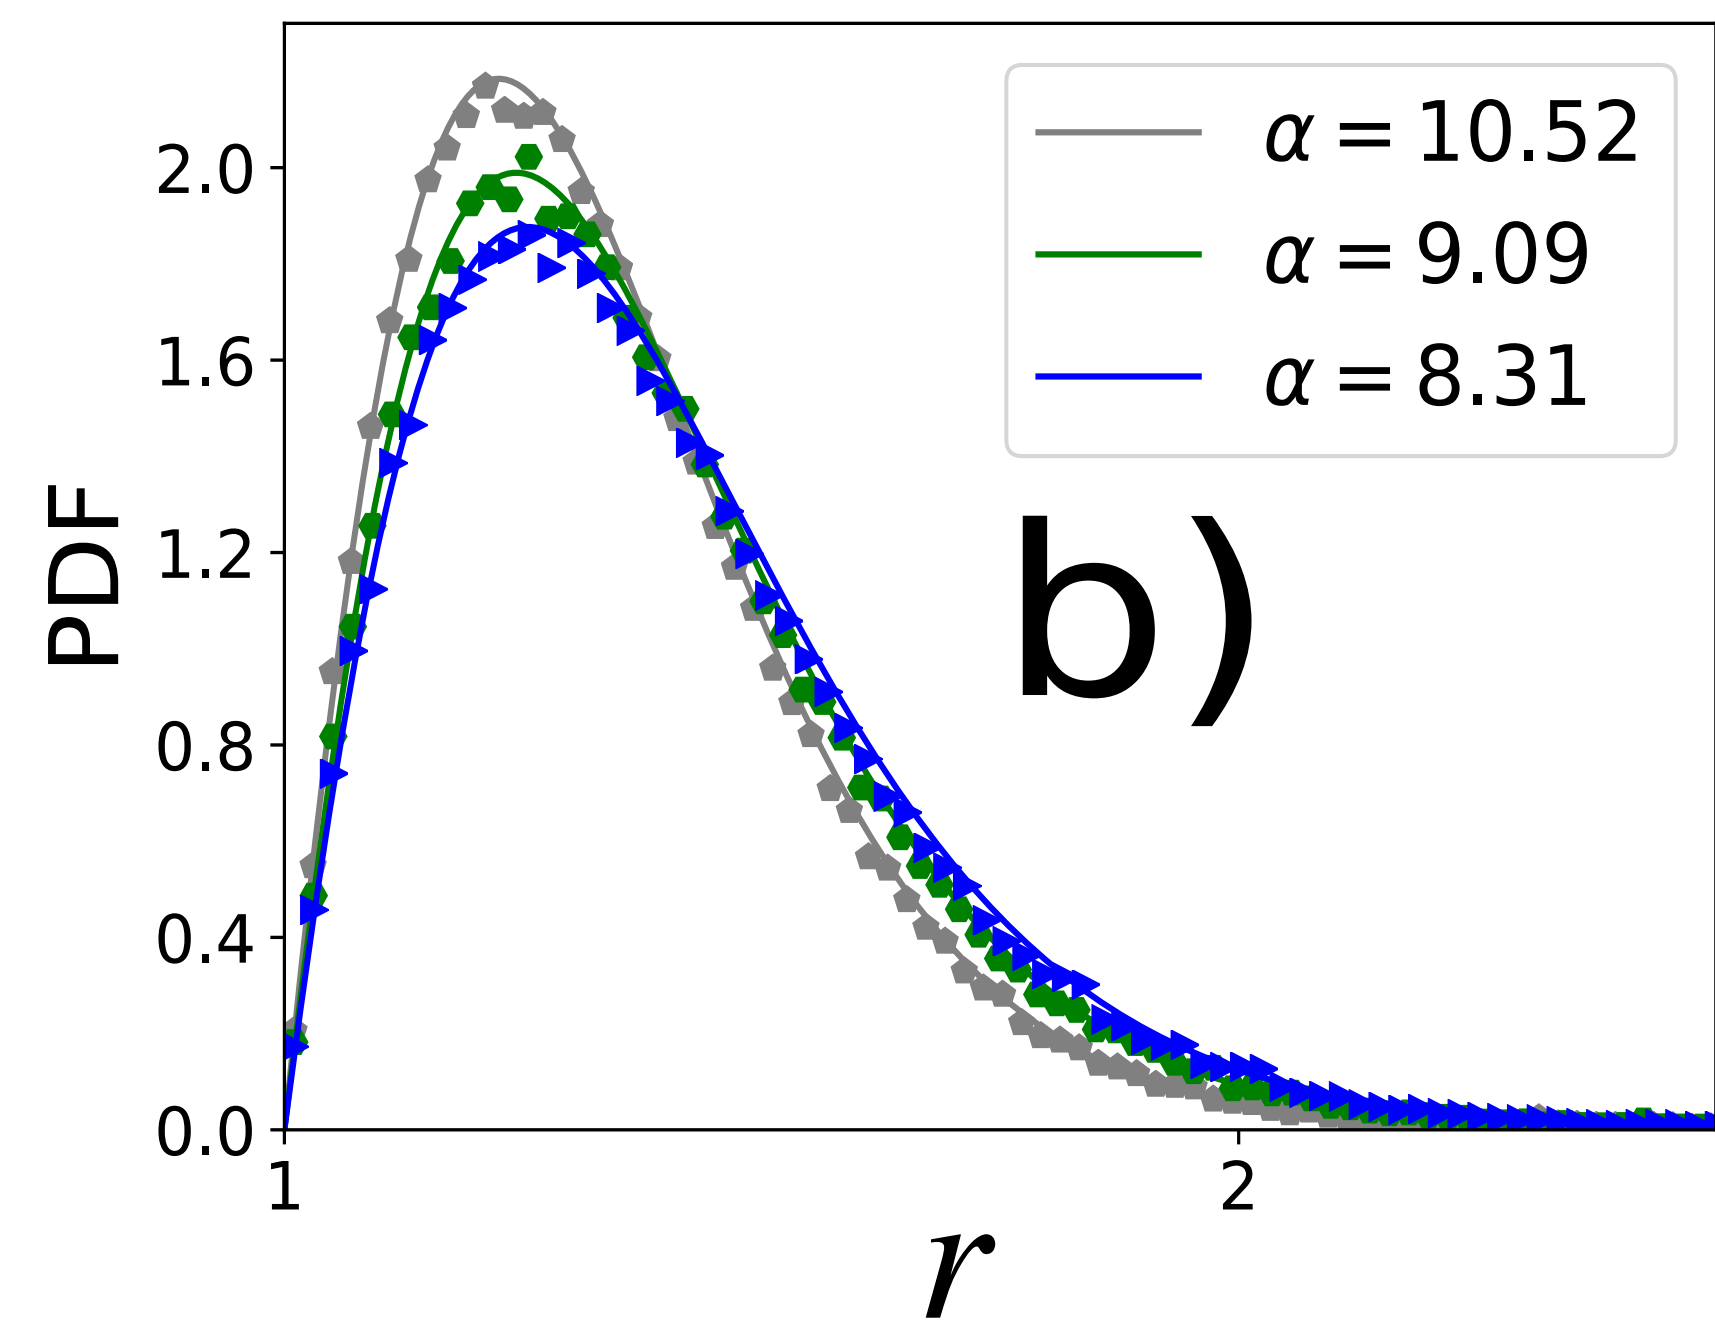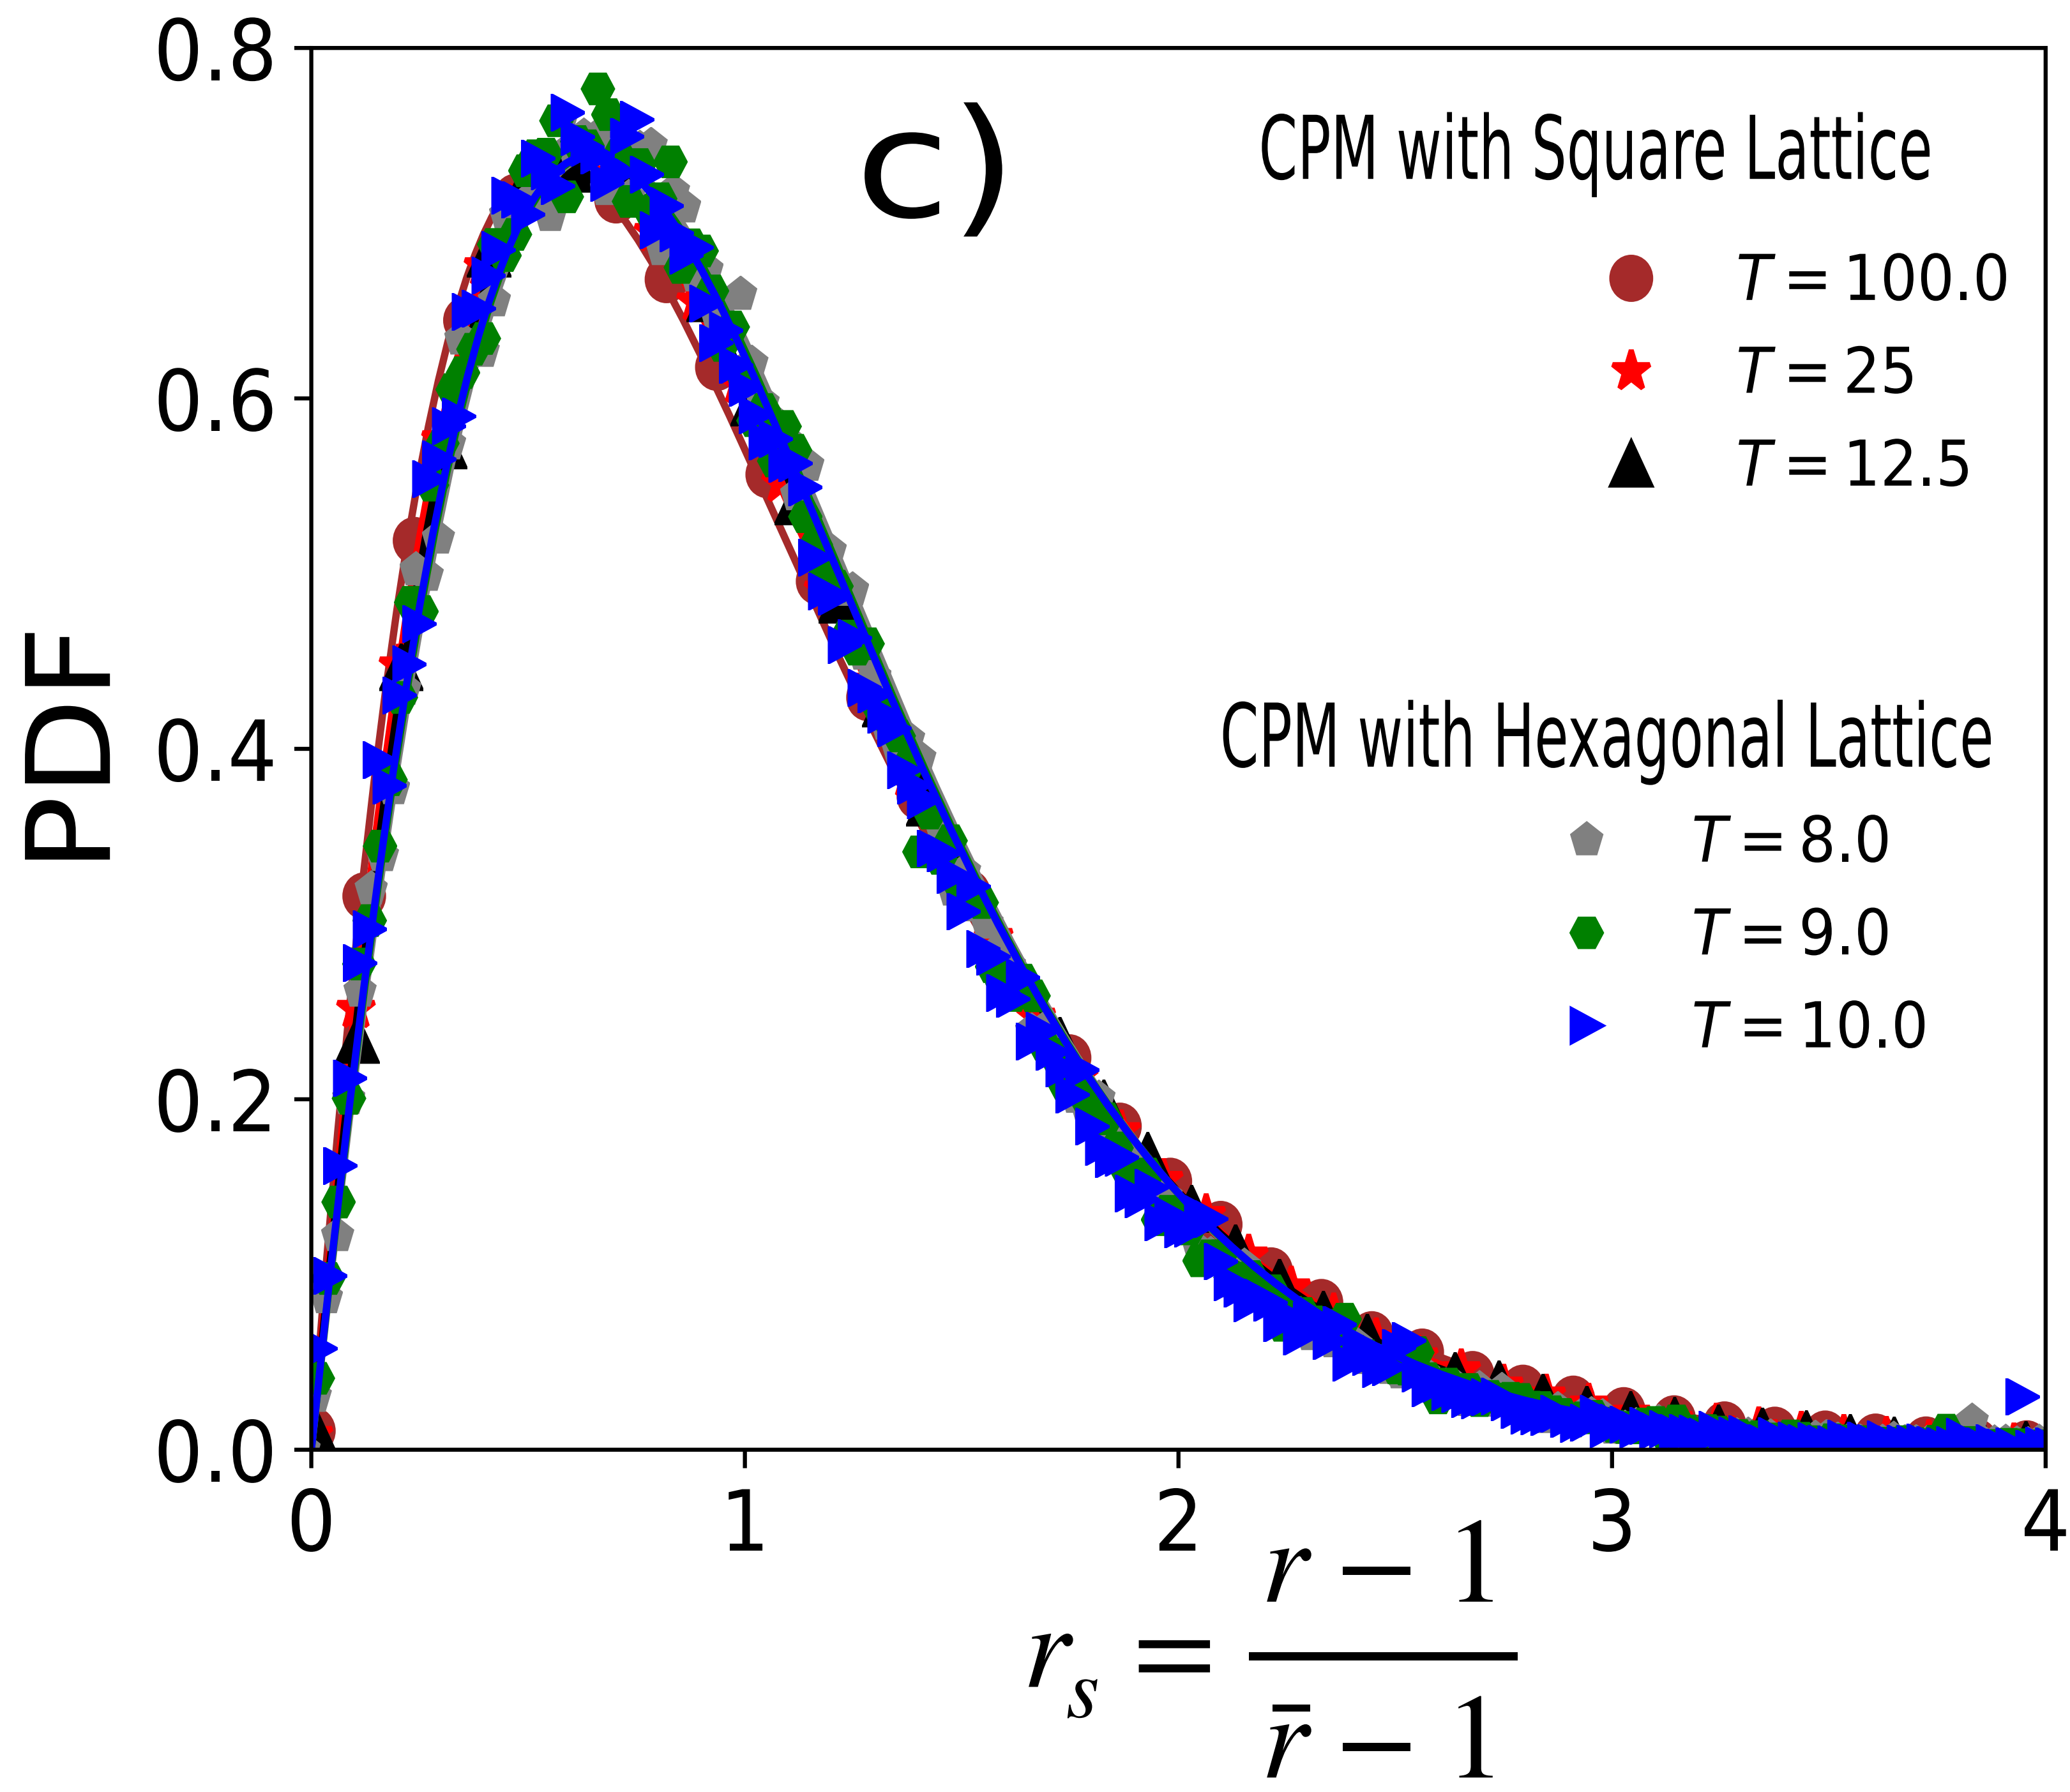

Supplement: supp [file elife-76406-supp-v1.zip]

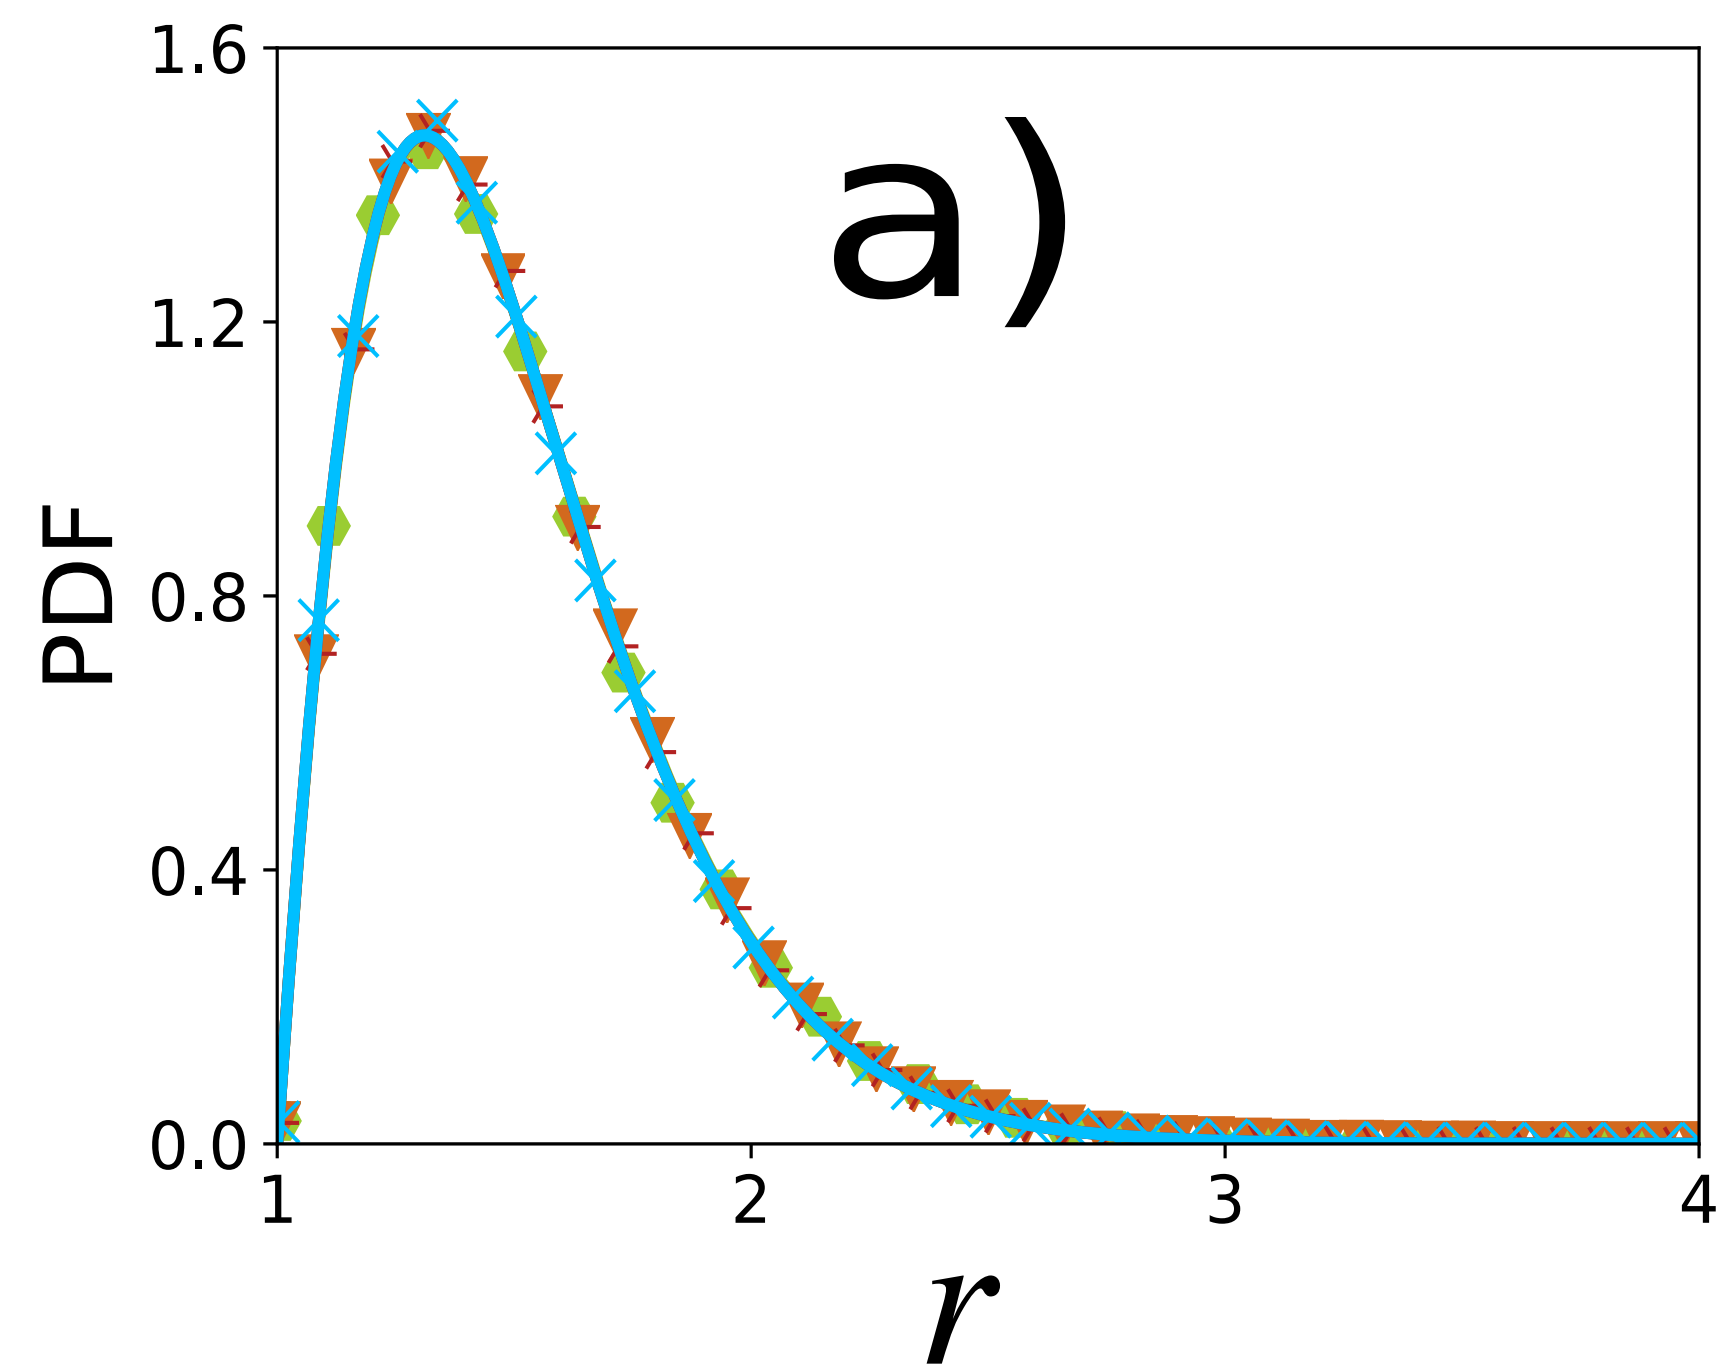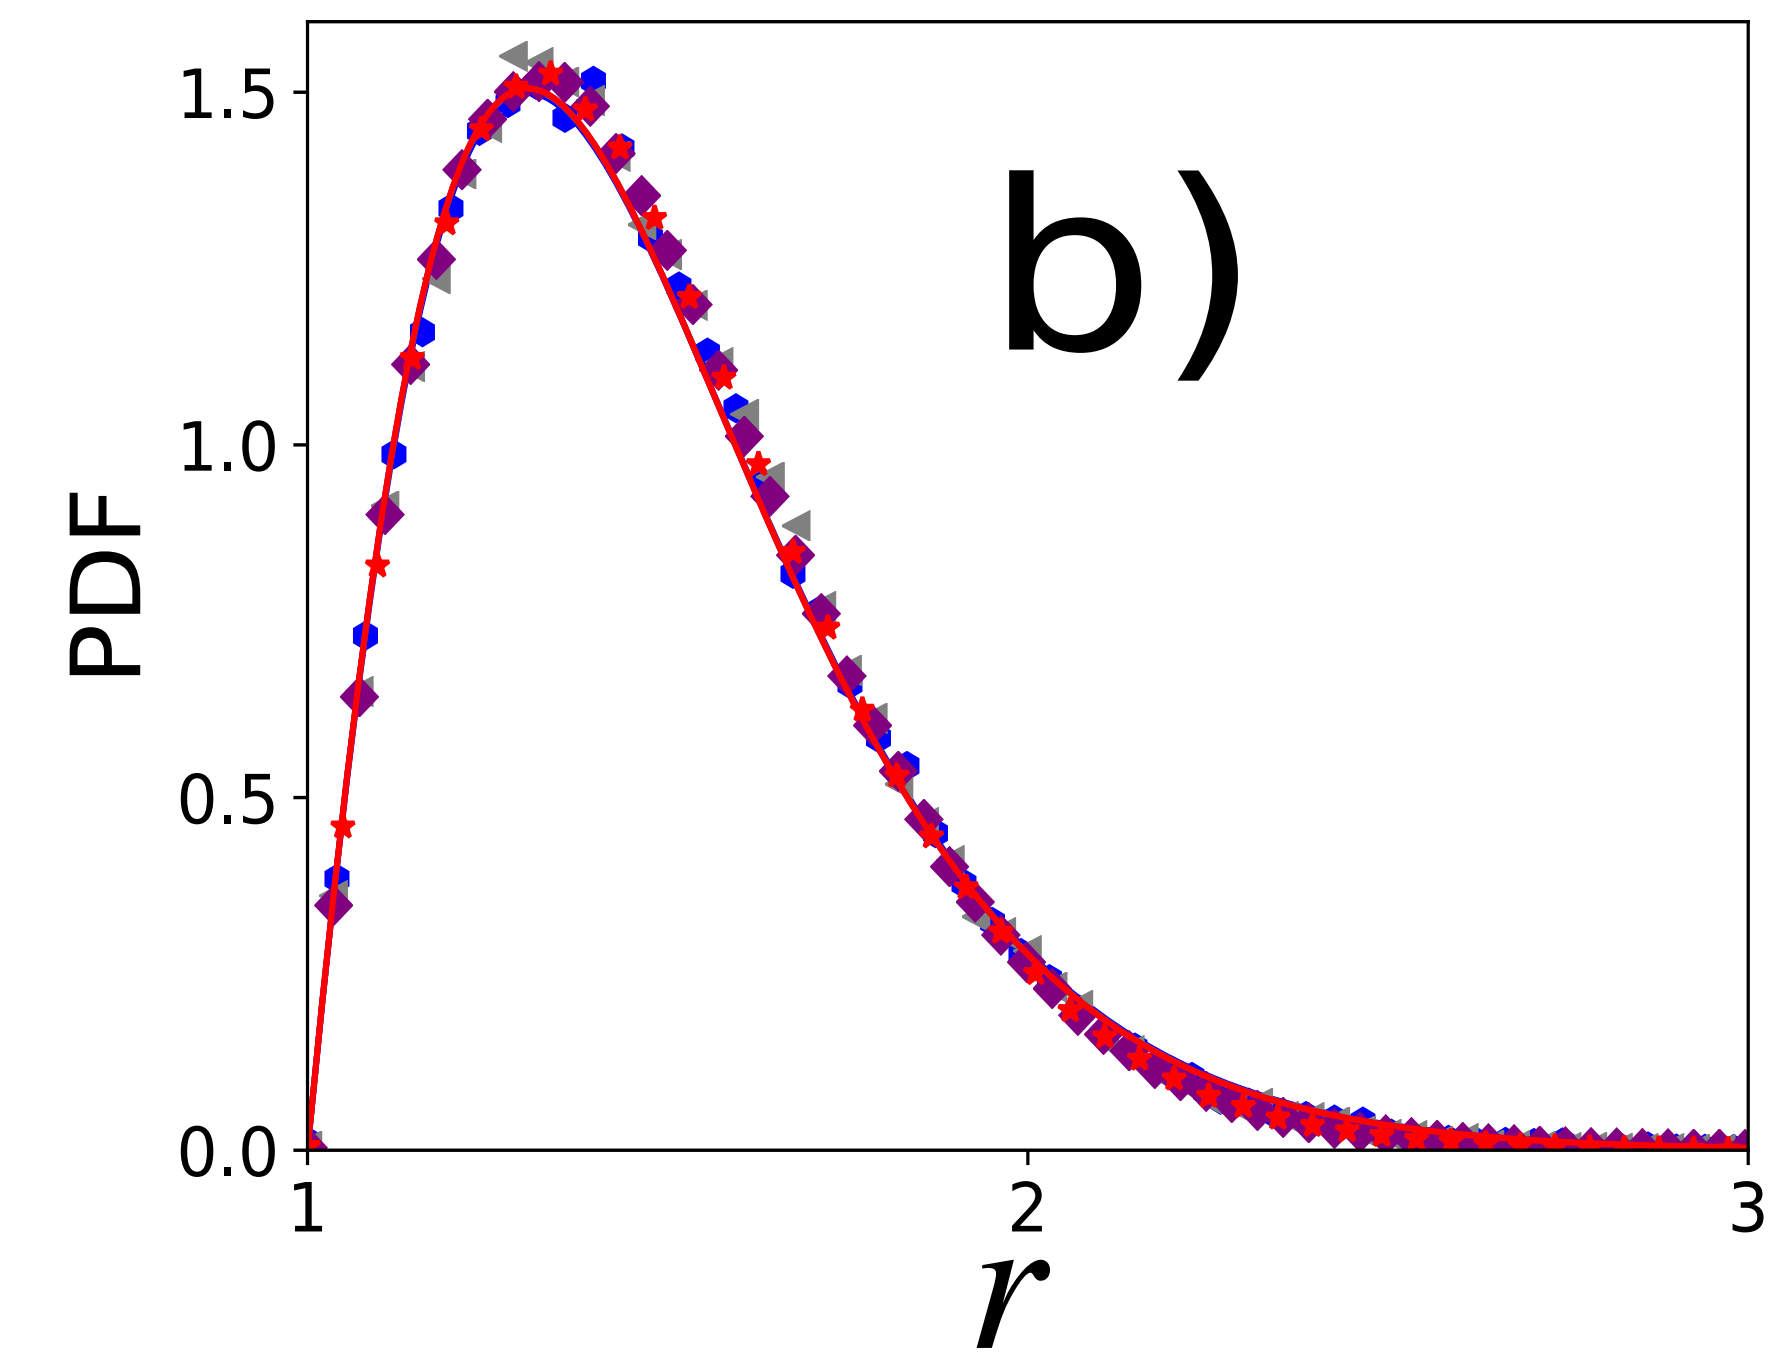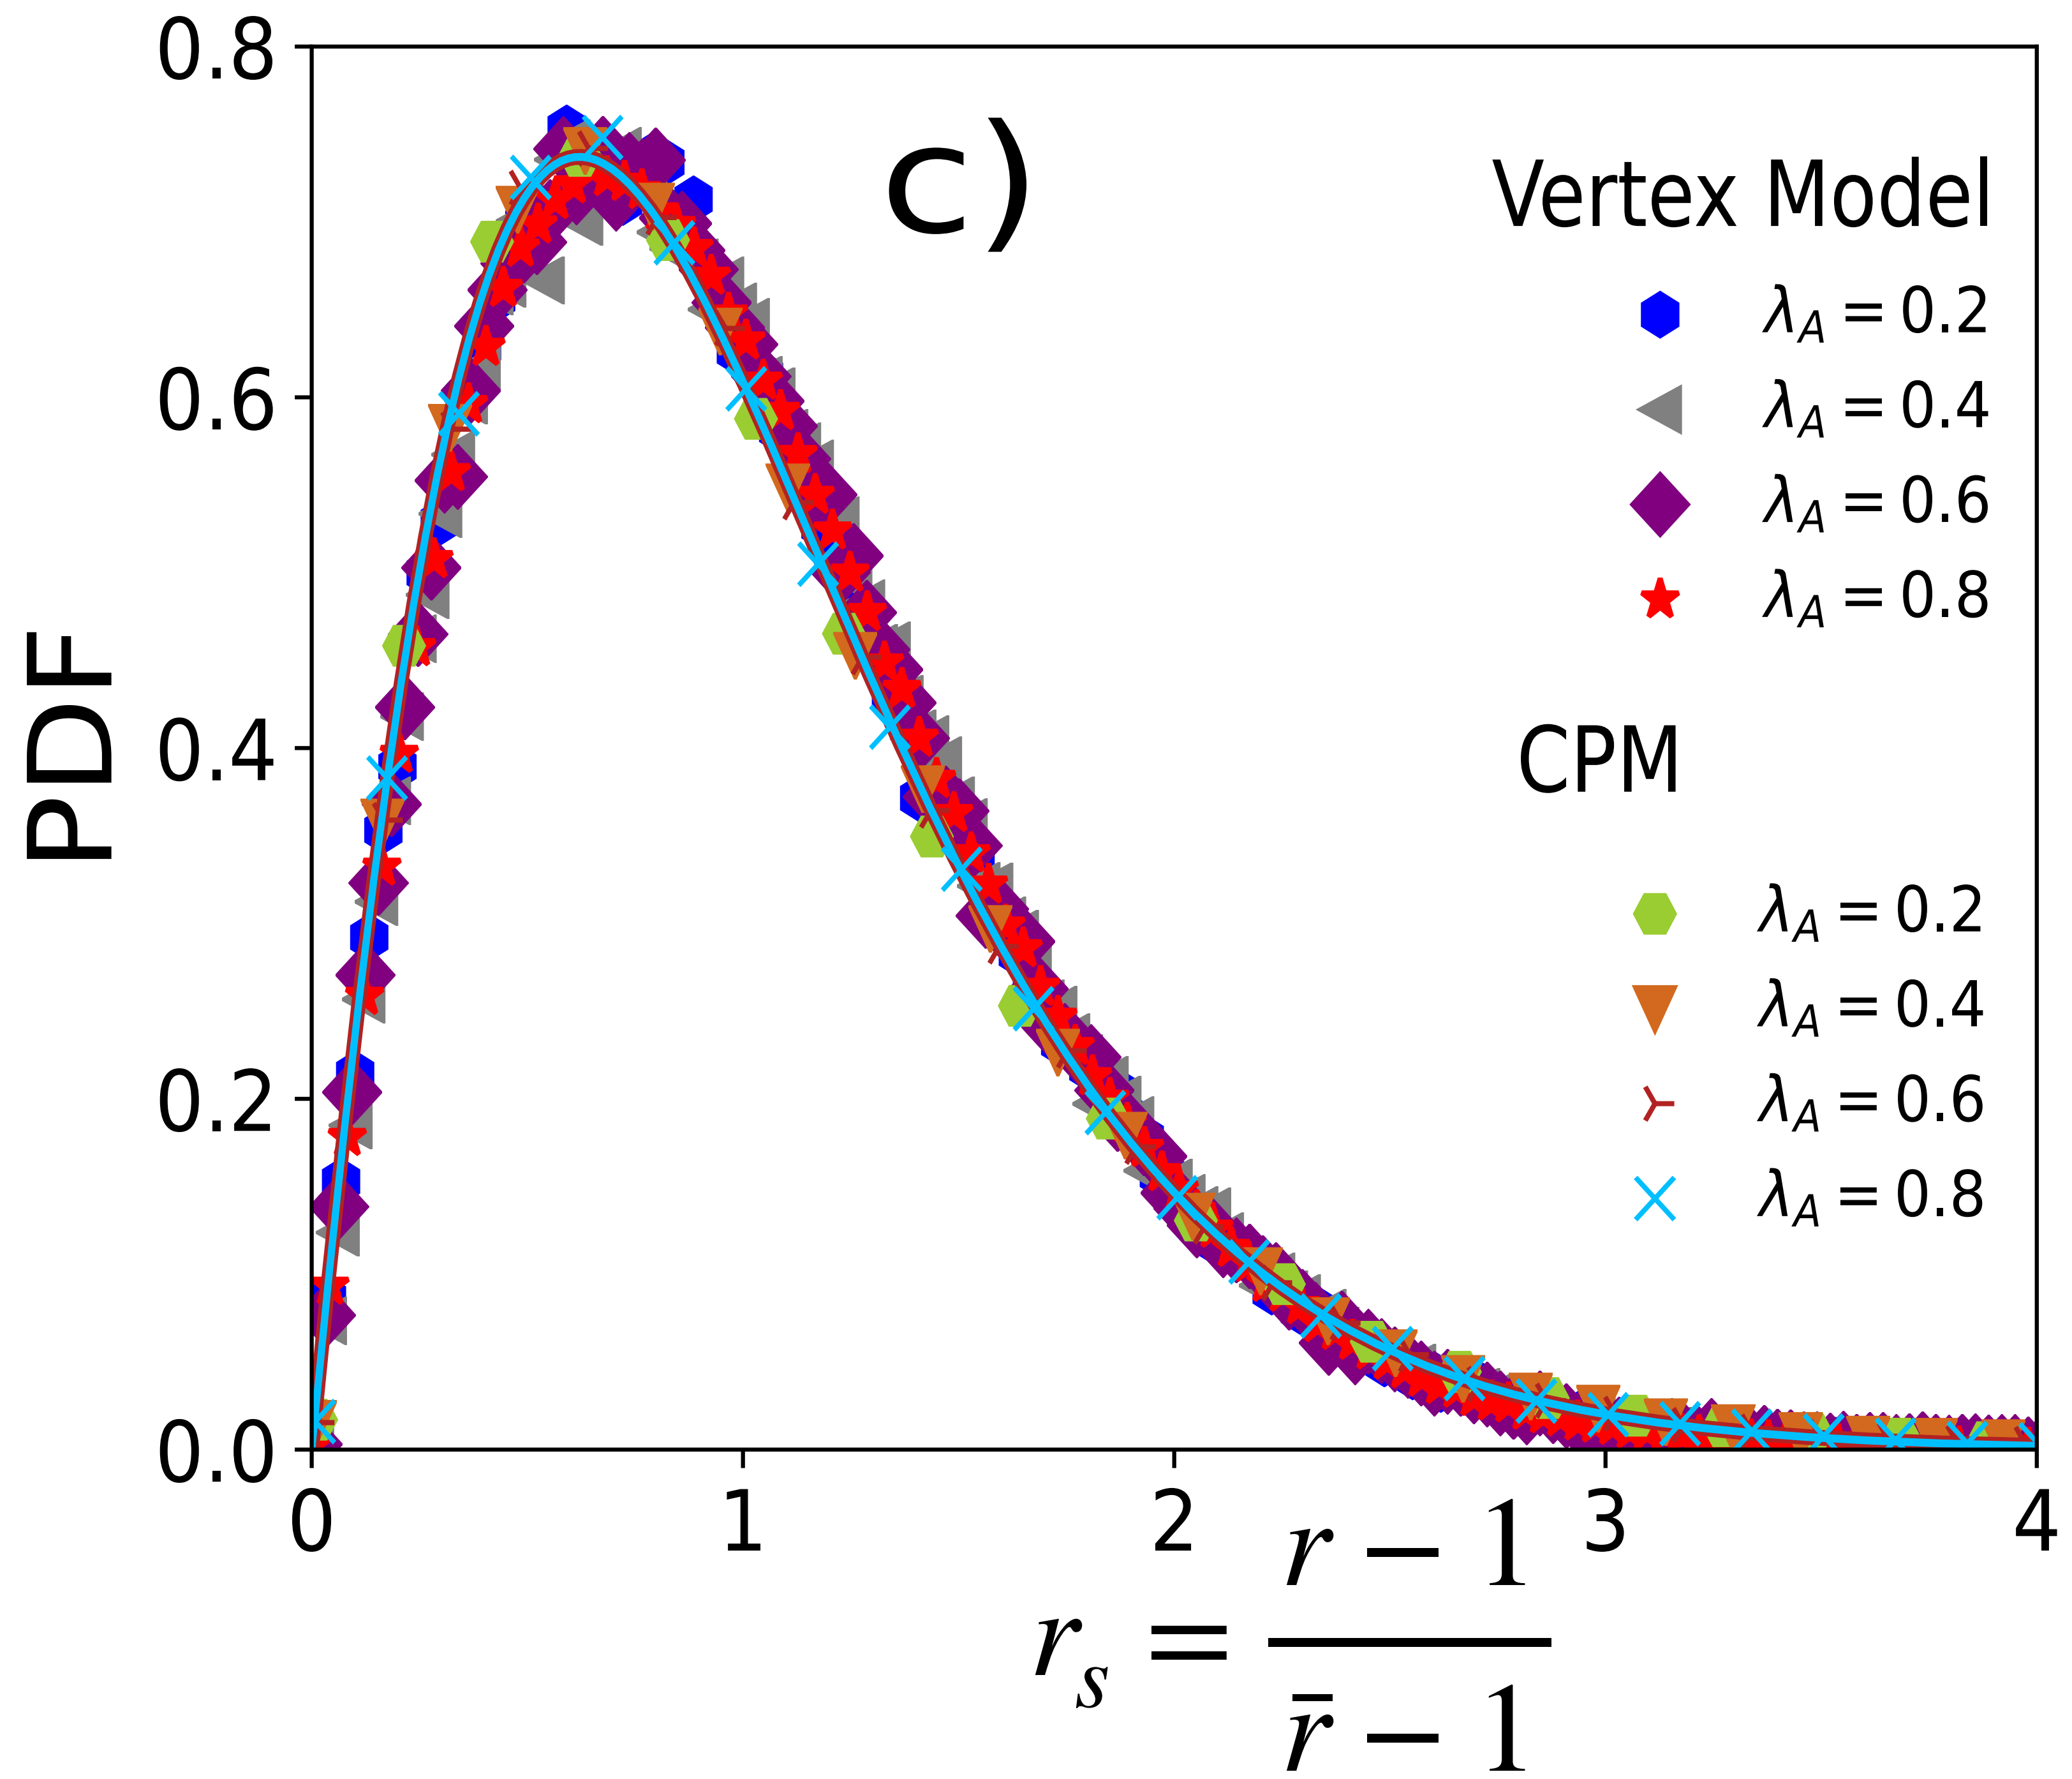

Supplement: supp [file elife-76406-supp-v1.zip › elife_poa_e76406_Figure_2_figure_supplement_1.pdf]

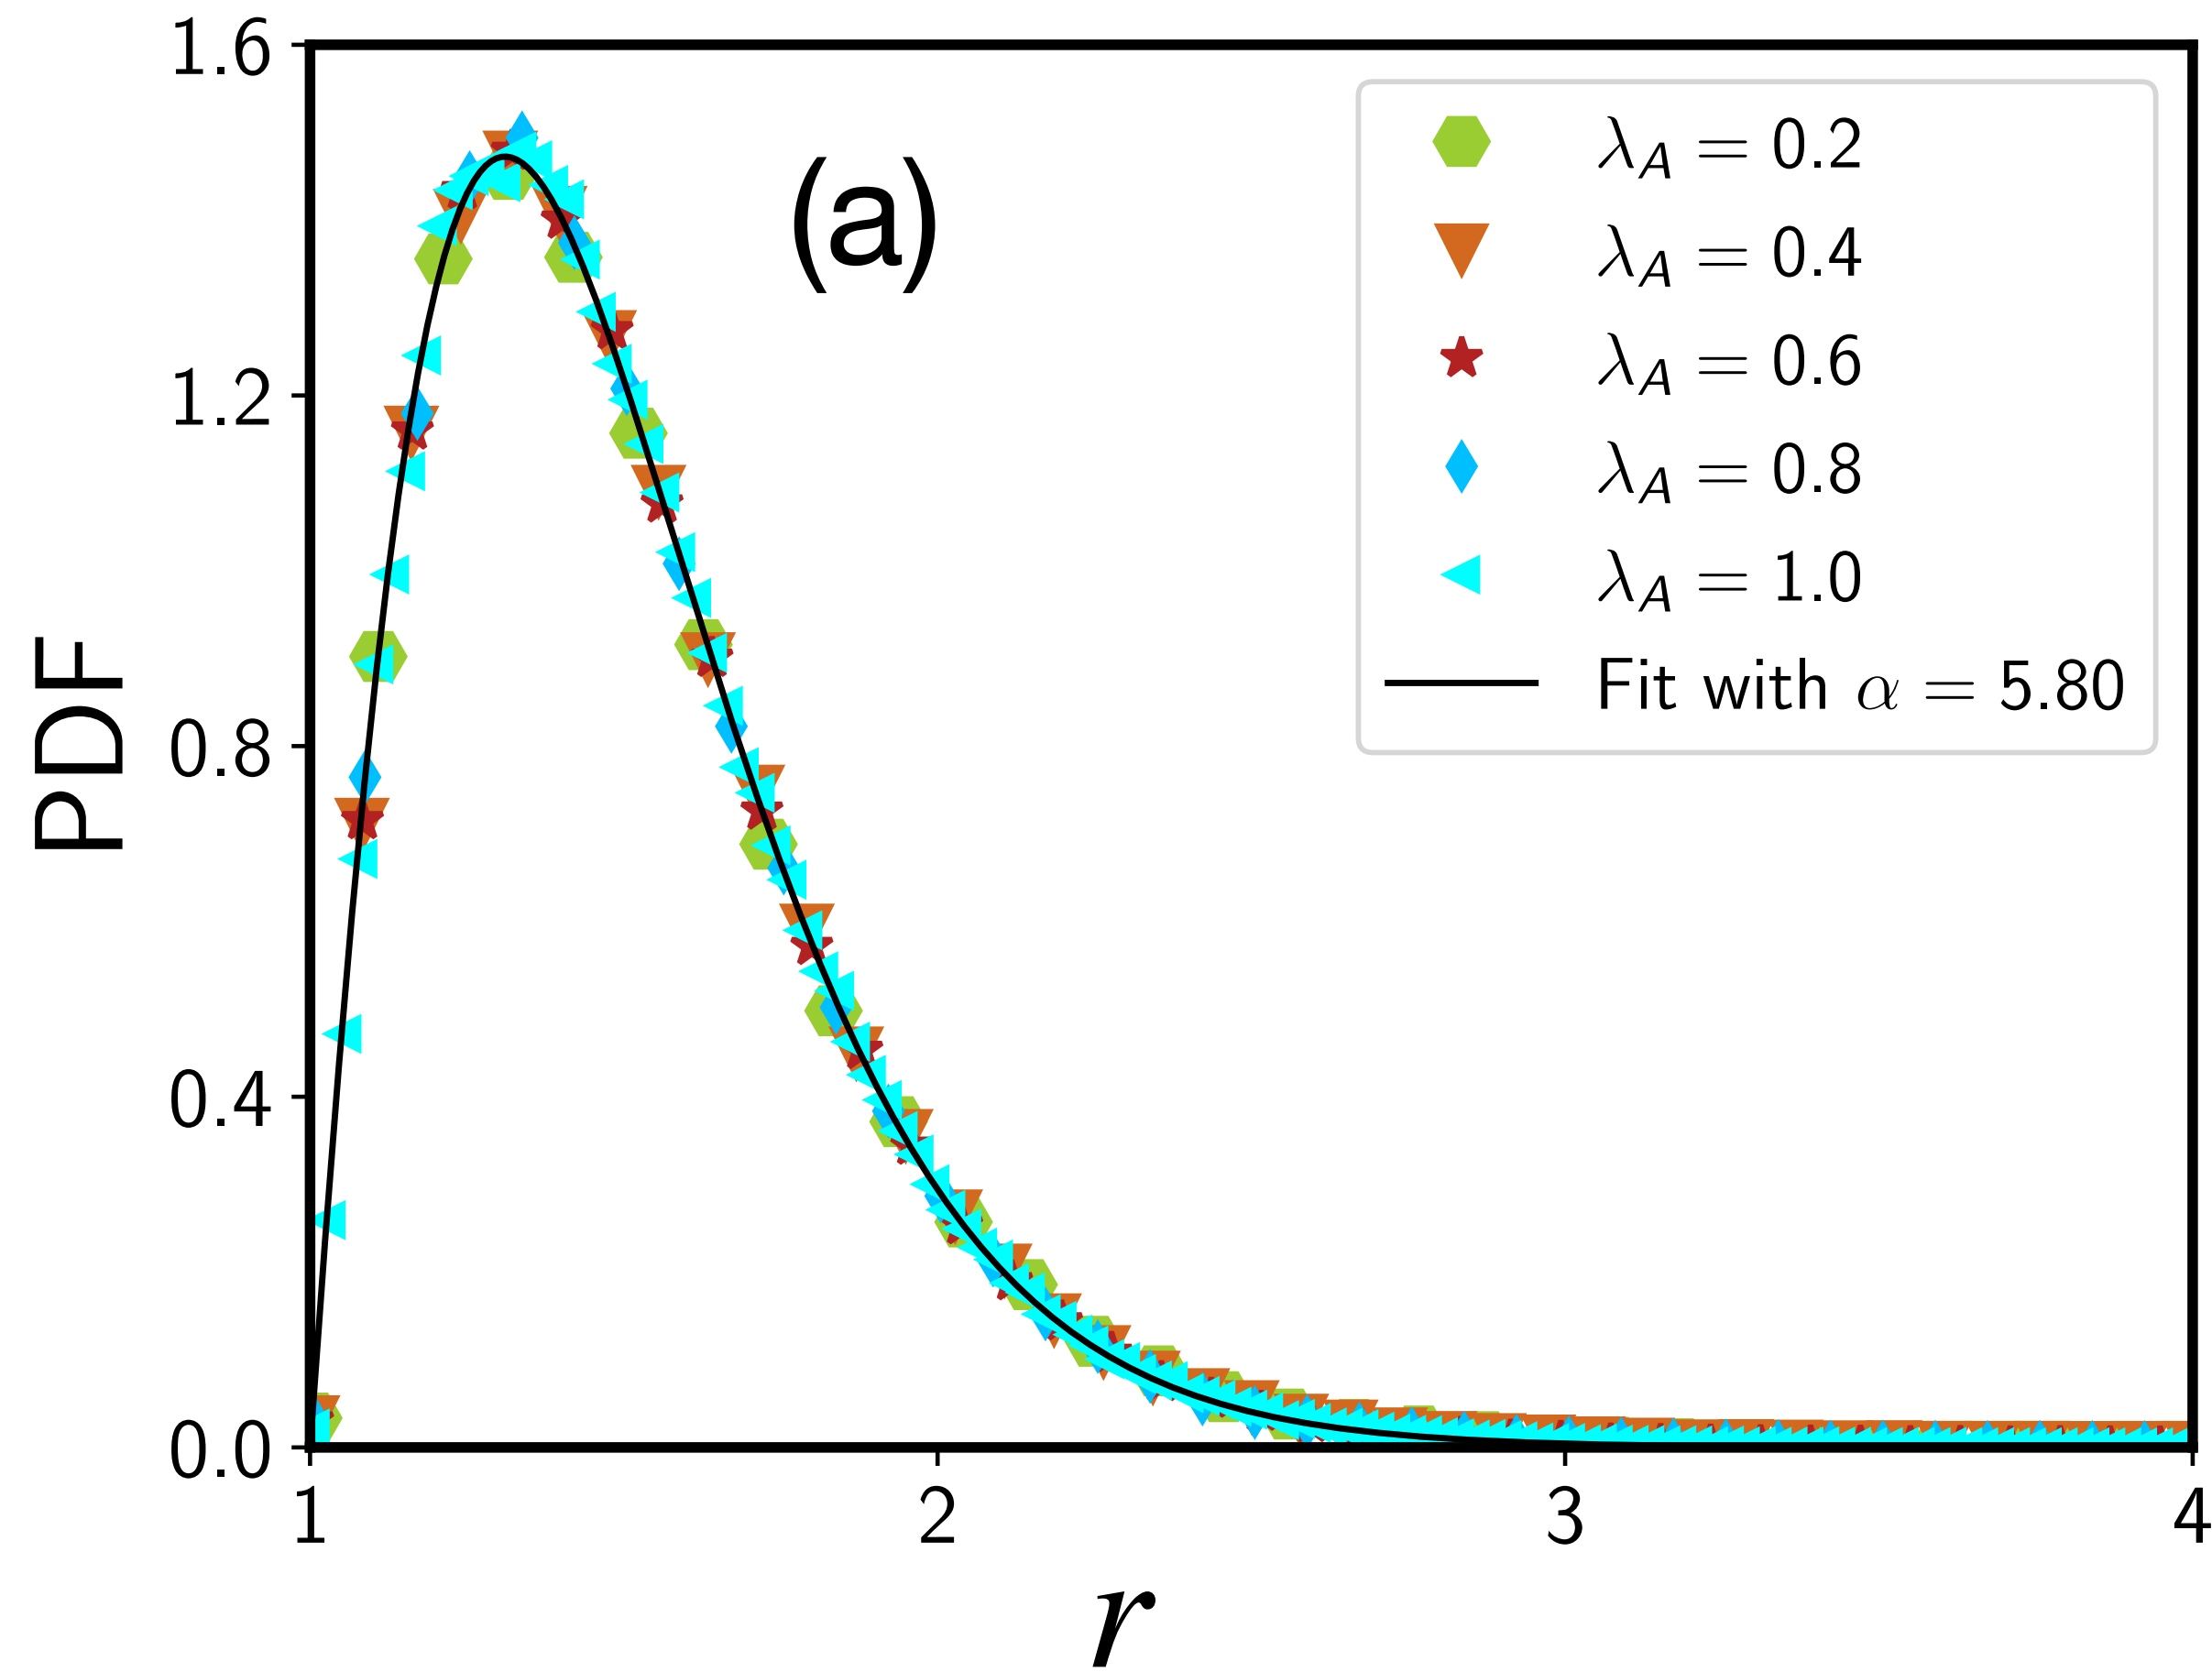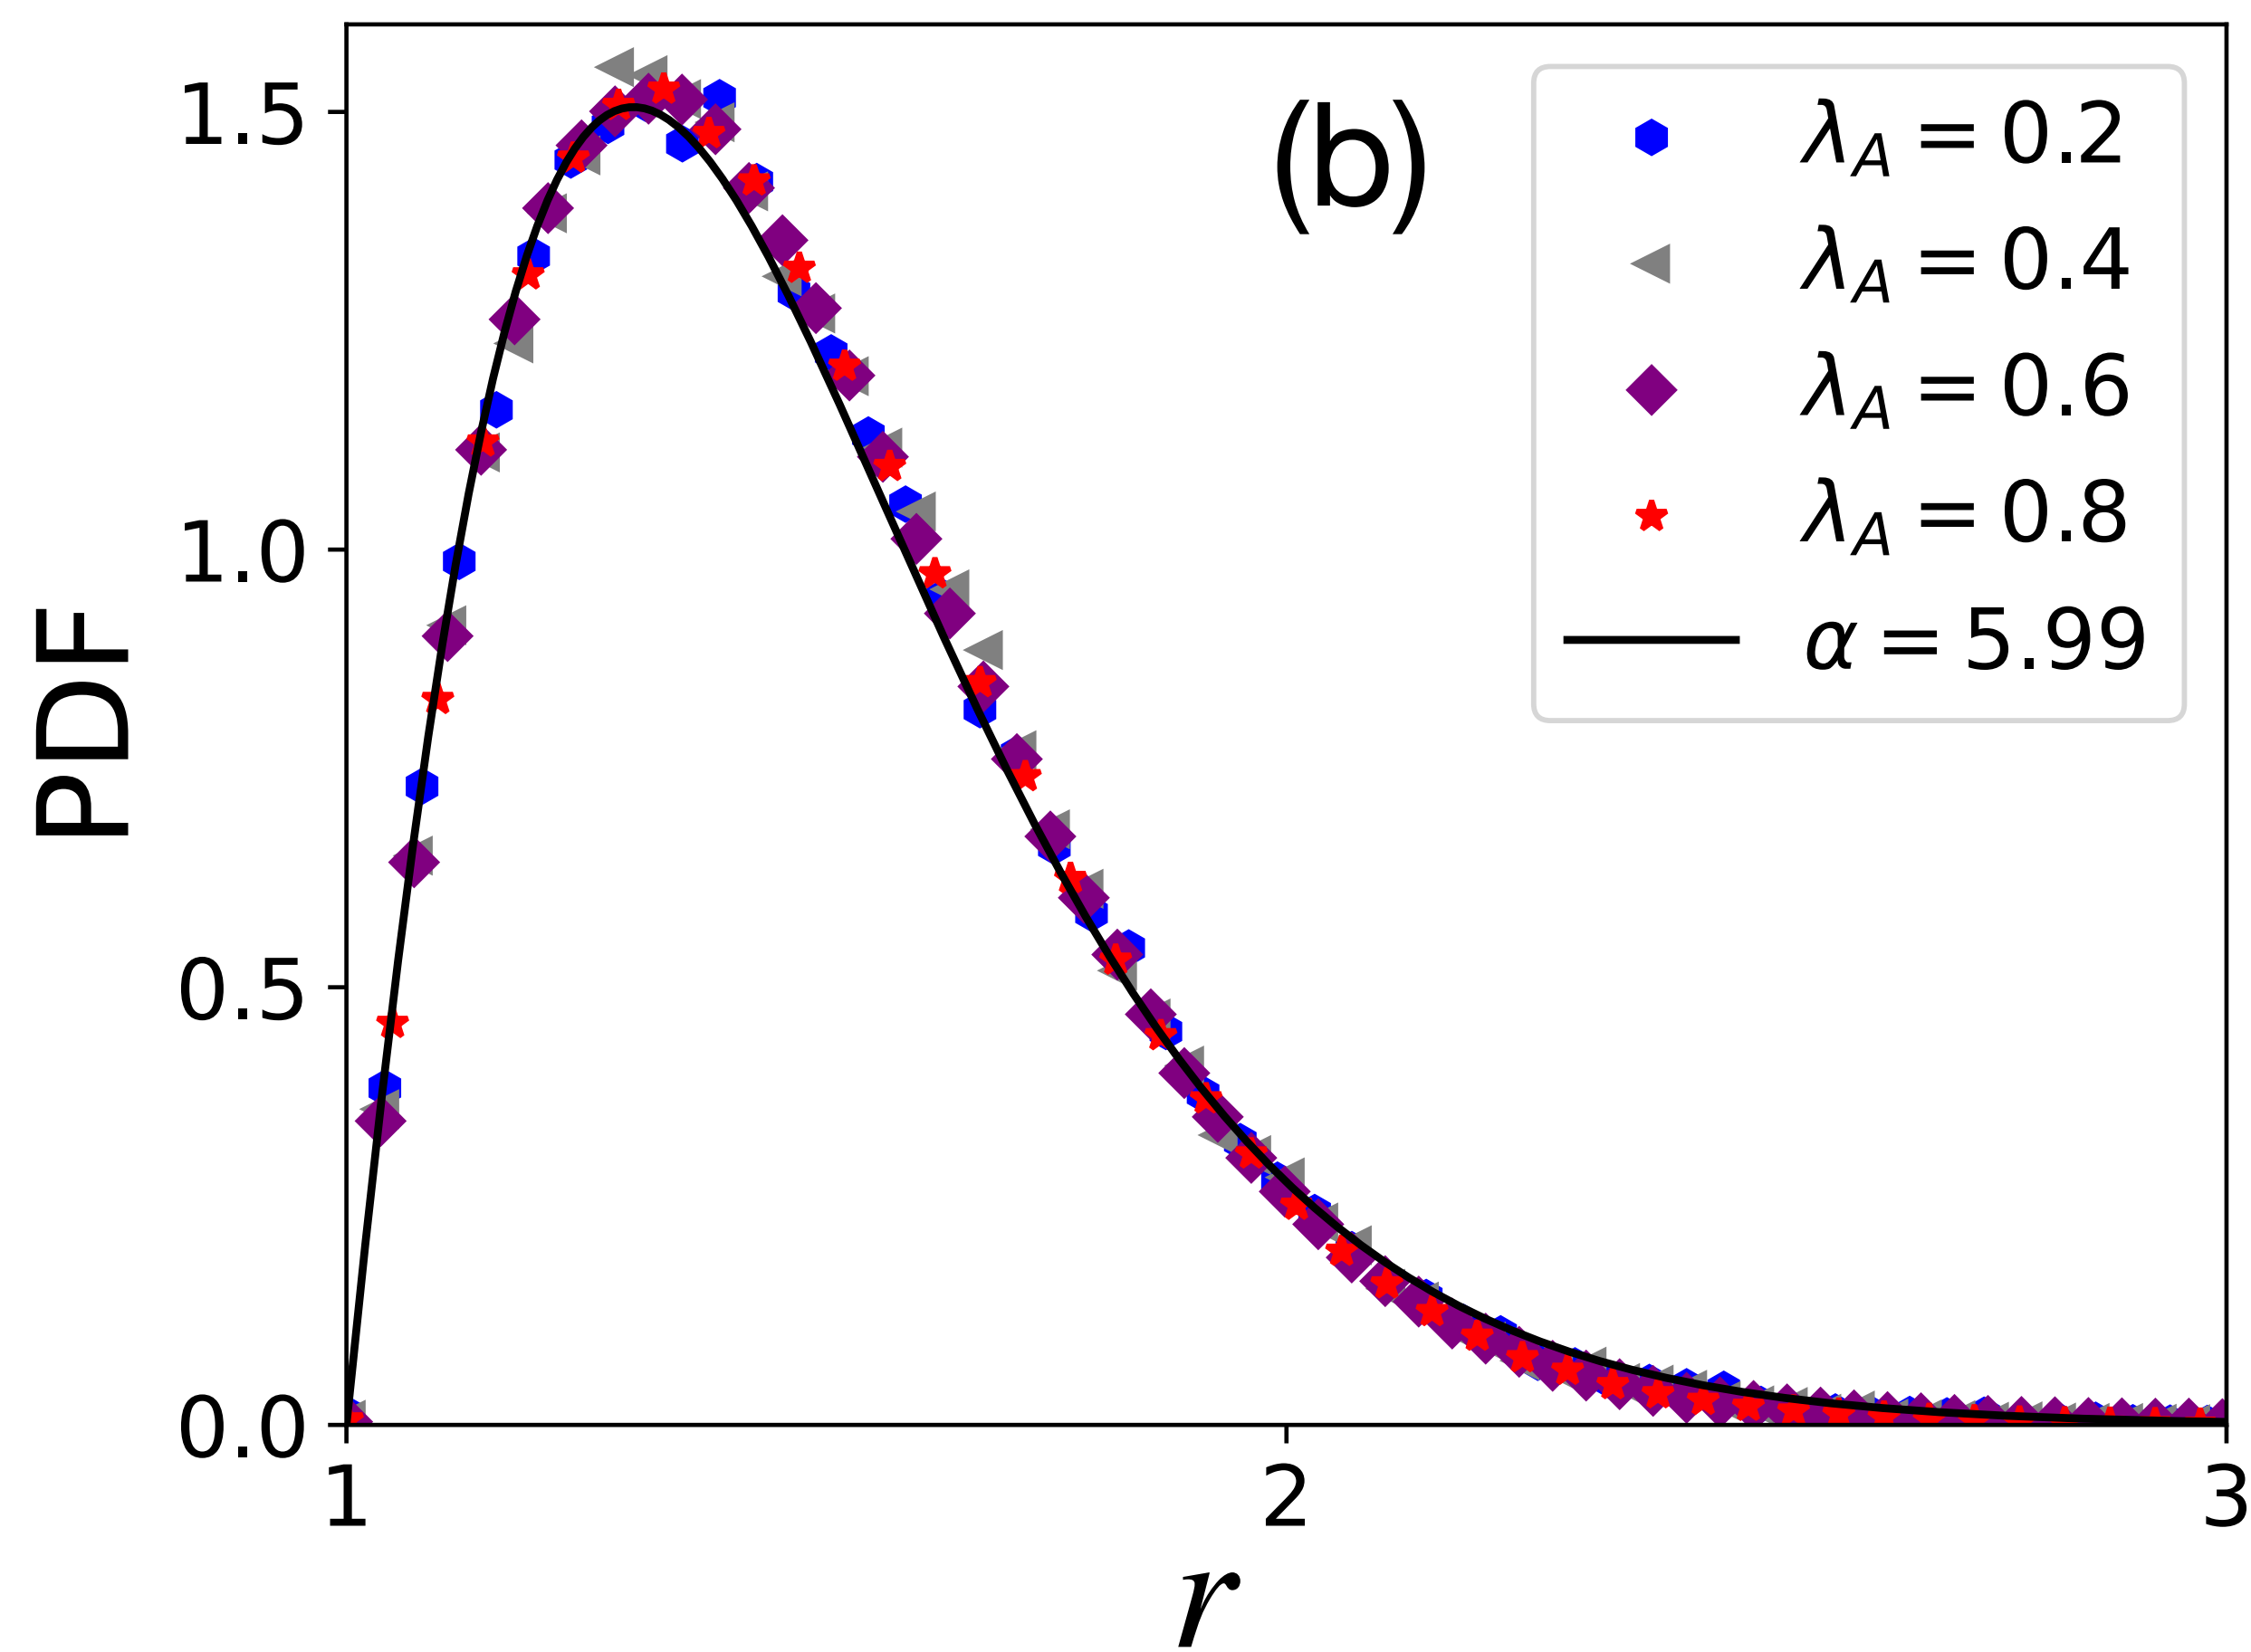

Supplement: supp [file elife-76406-supp-v1.zip › elife_poa_e76406_Figure_2_figure_supplement_2.pdf]

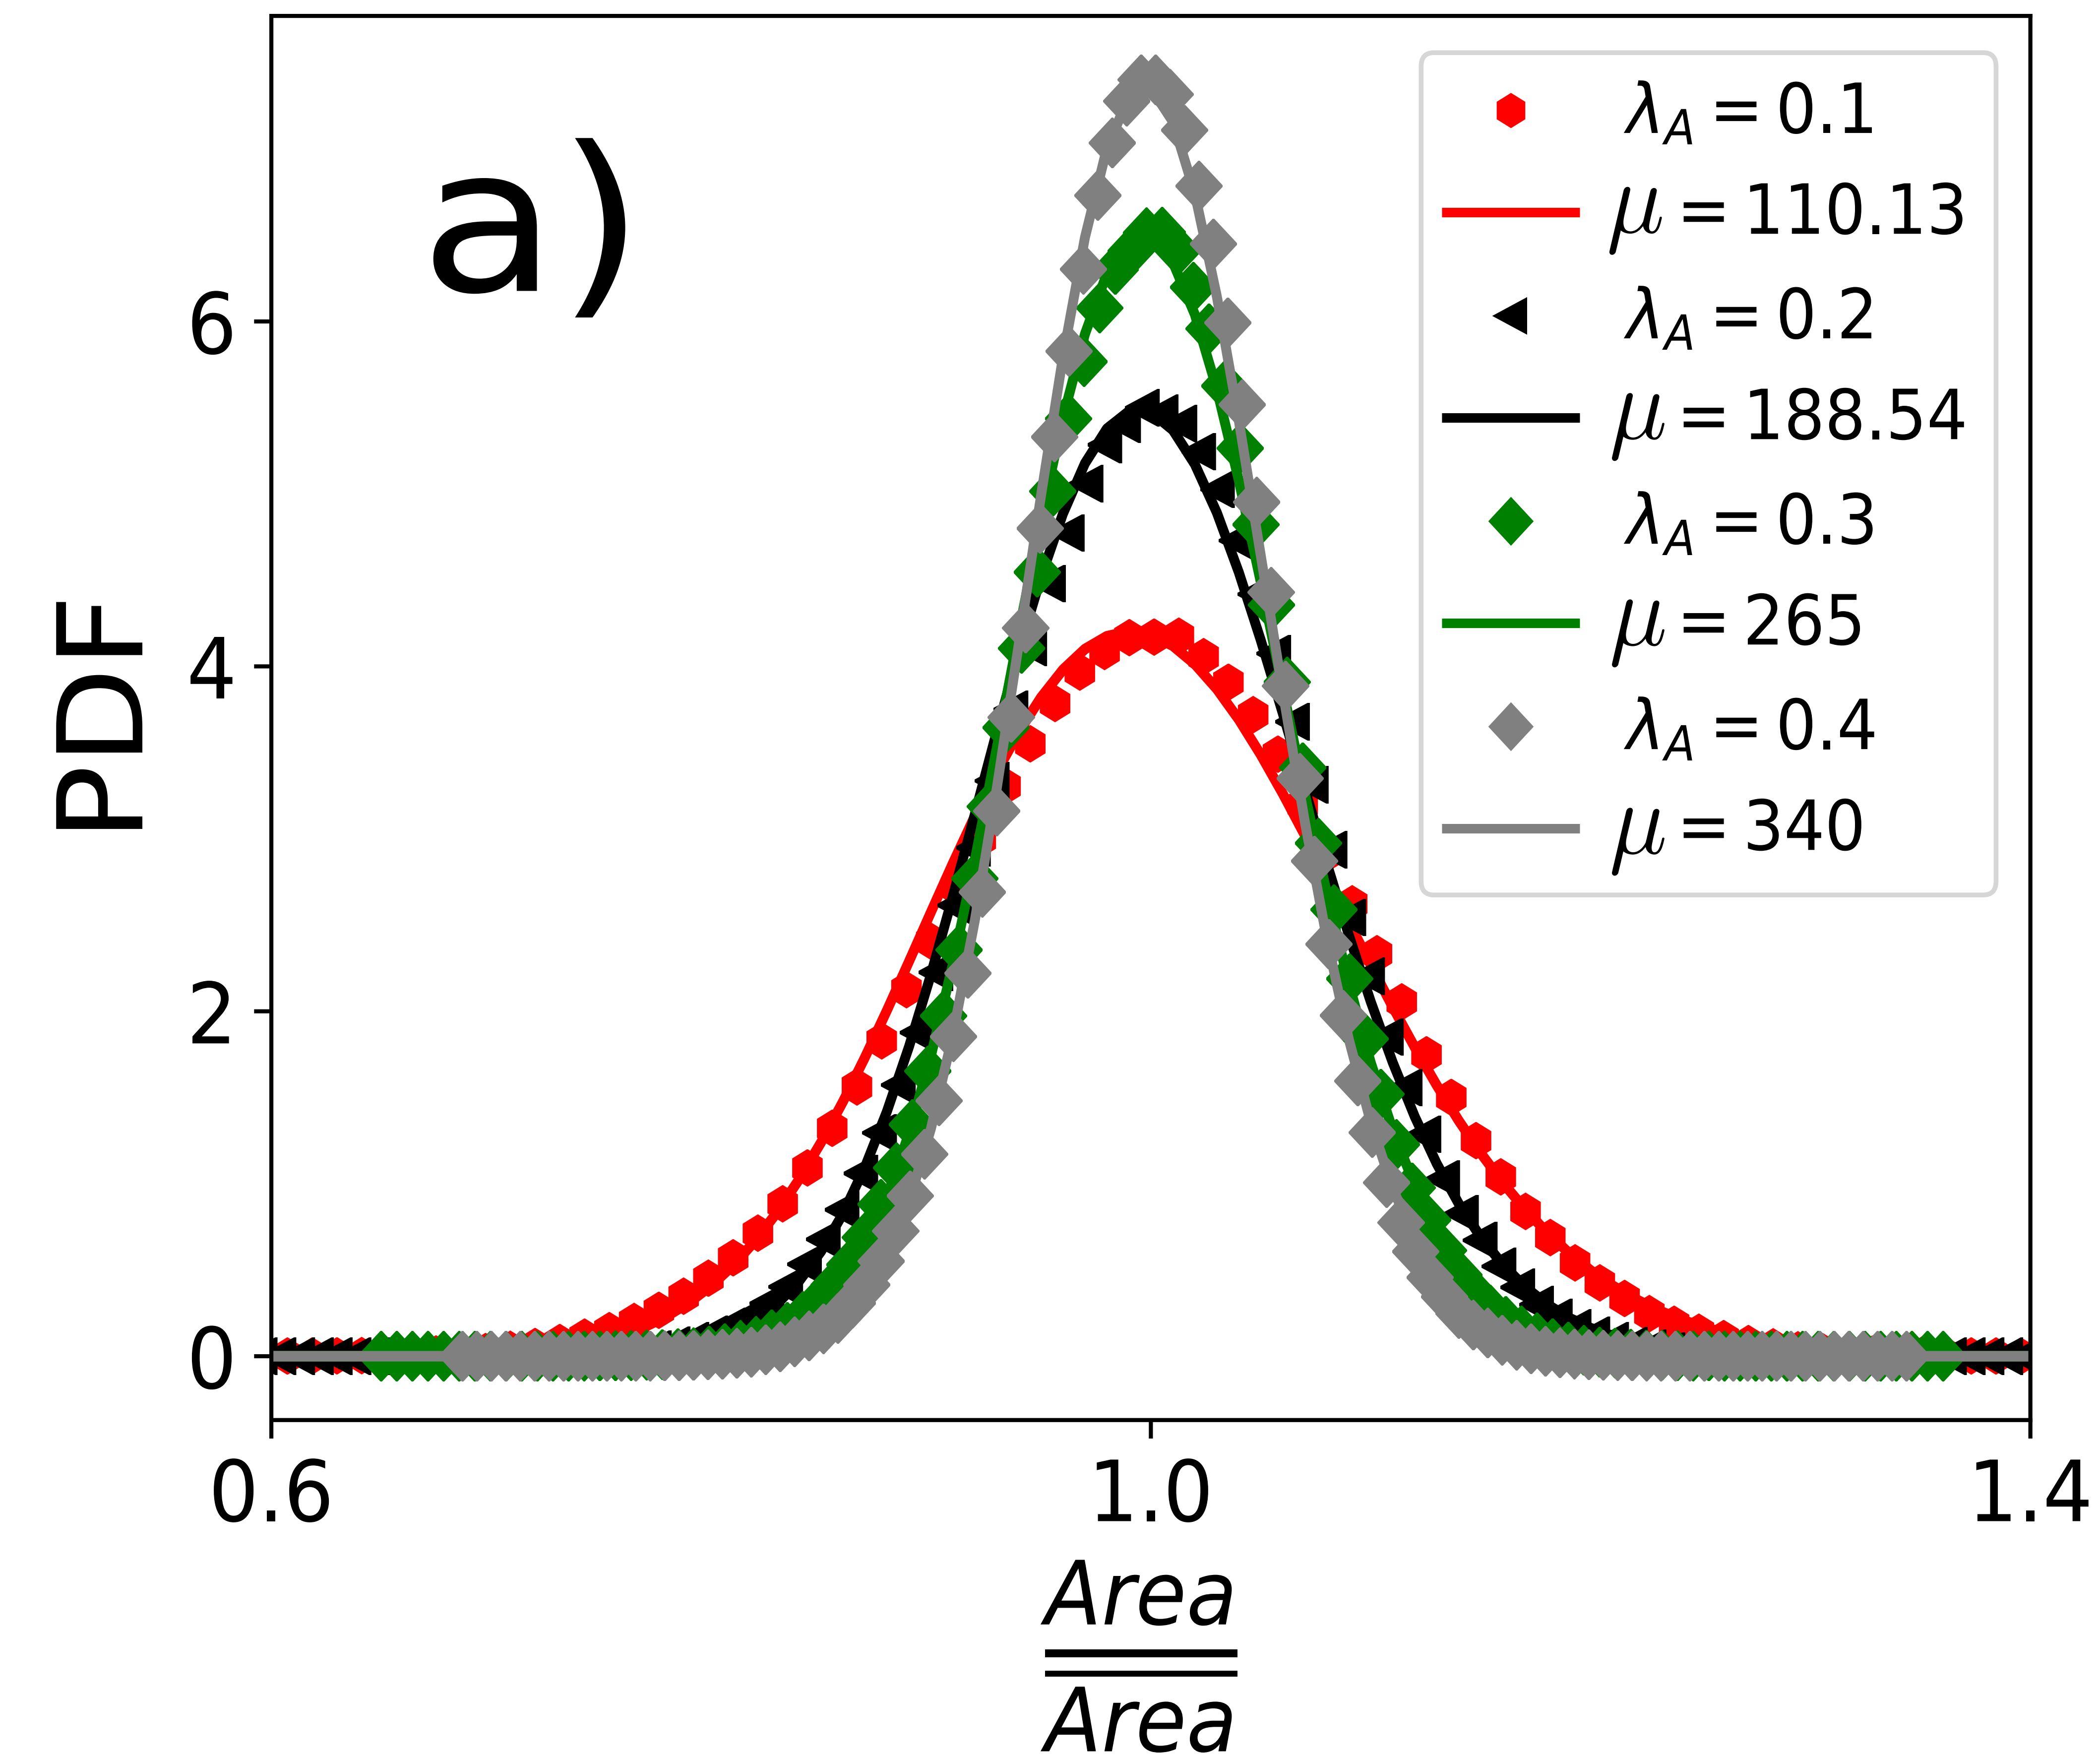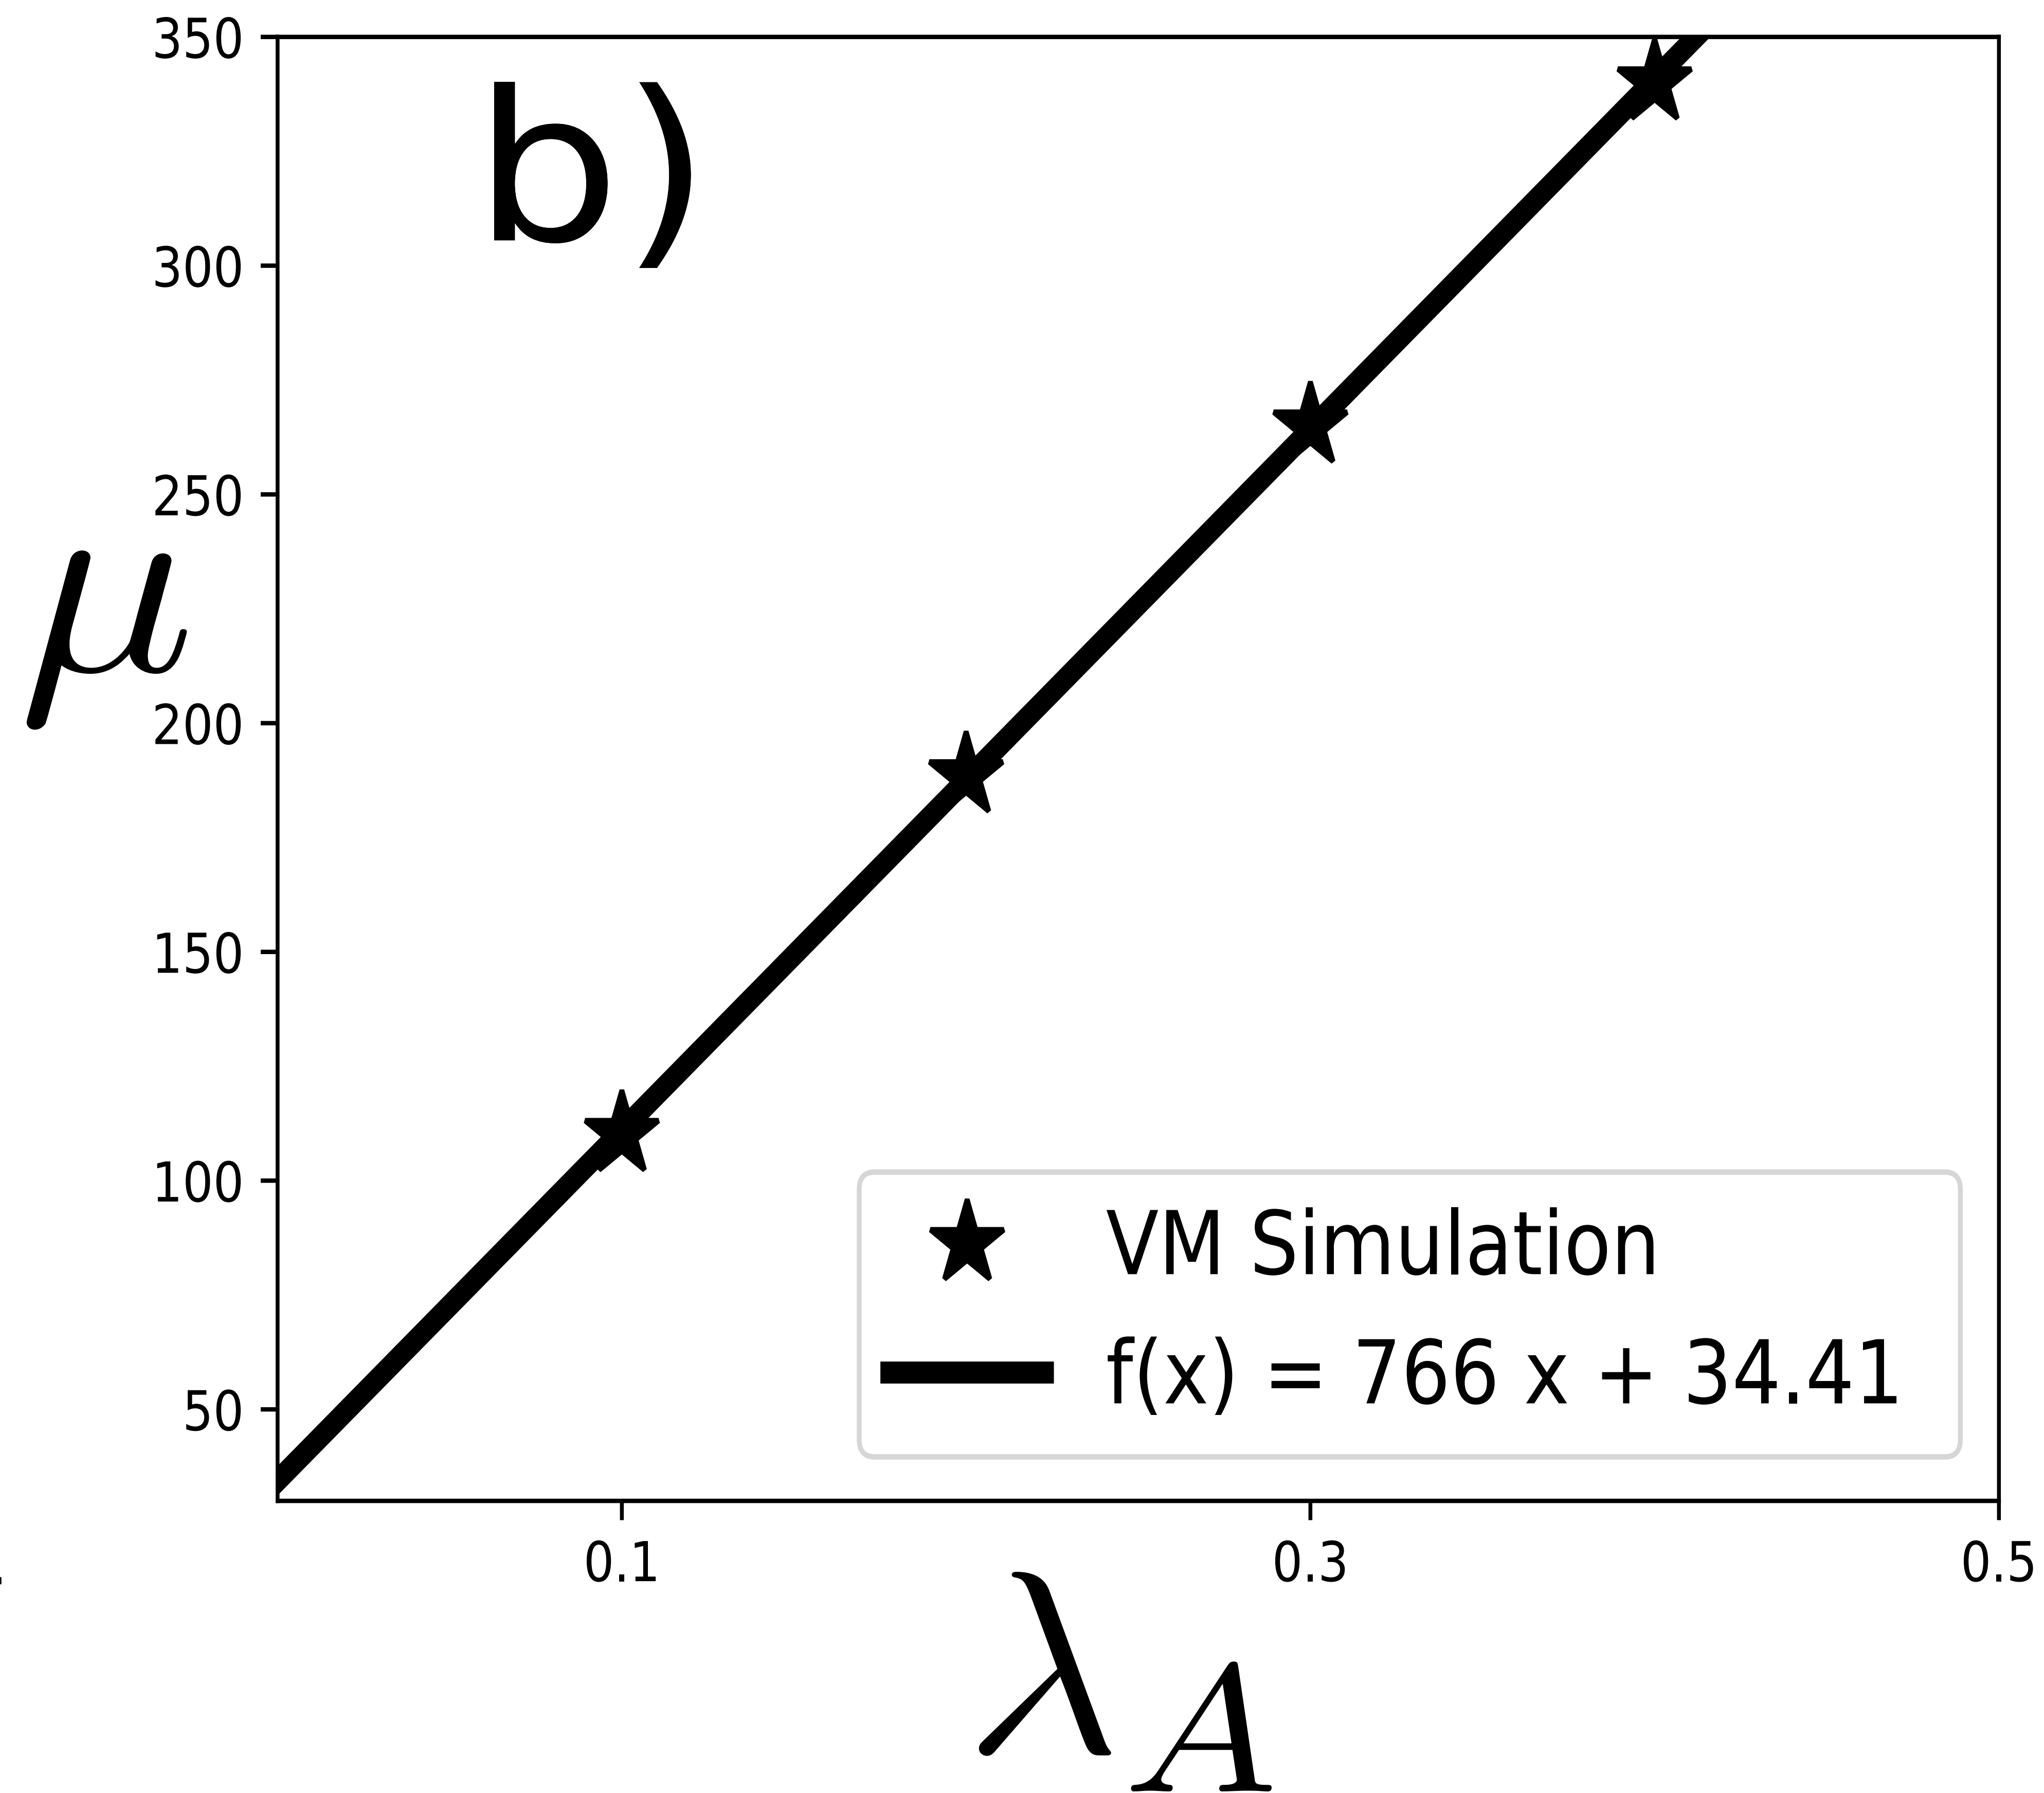

Supplement: supp [file elife-76406-supp-v1.zip › elife_poa_e76406_Figure_2_figure_supplement_3.pdf]

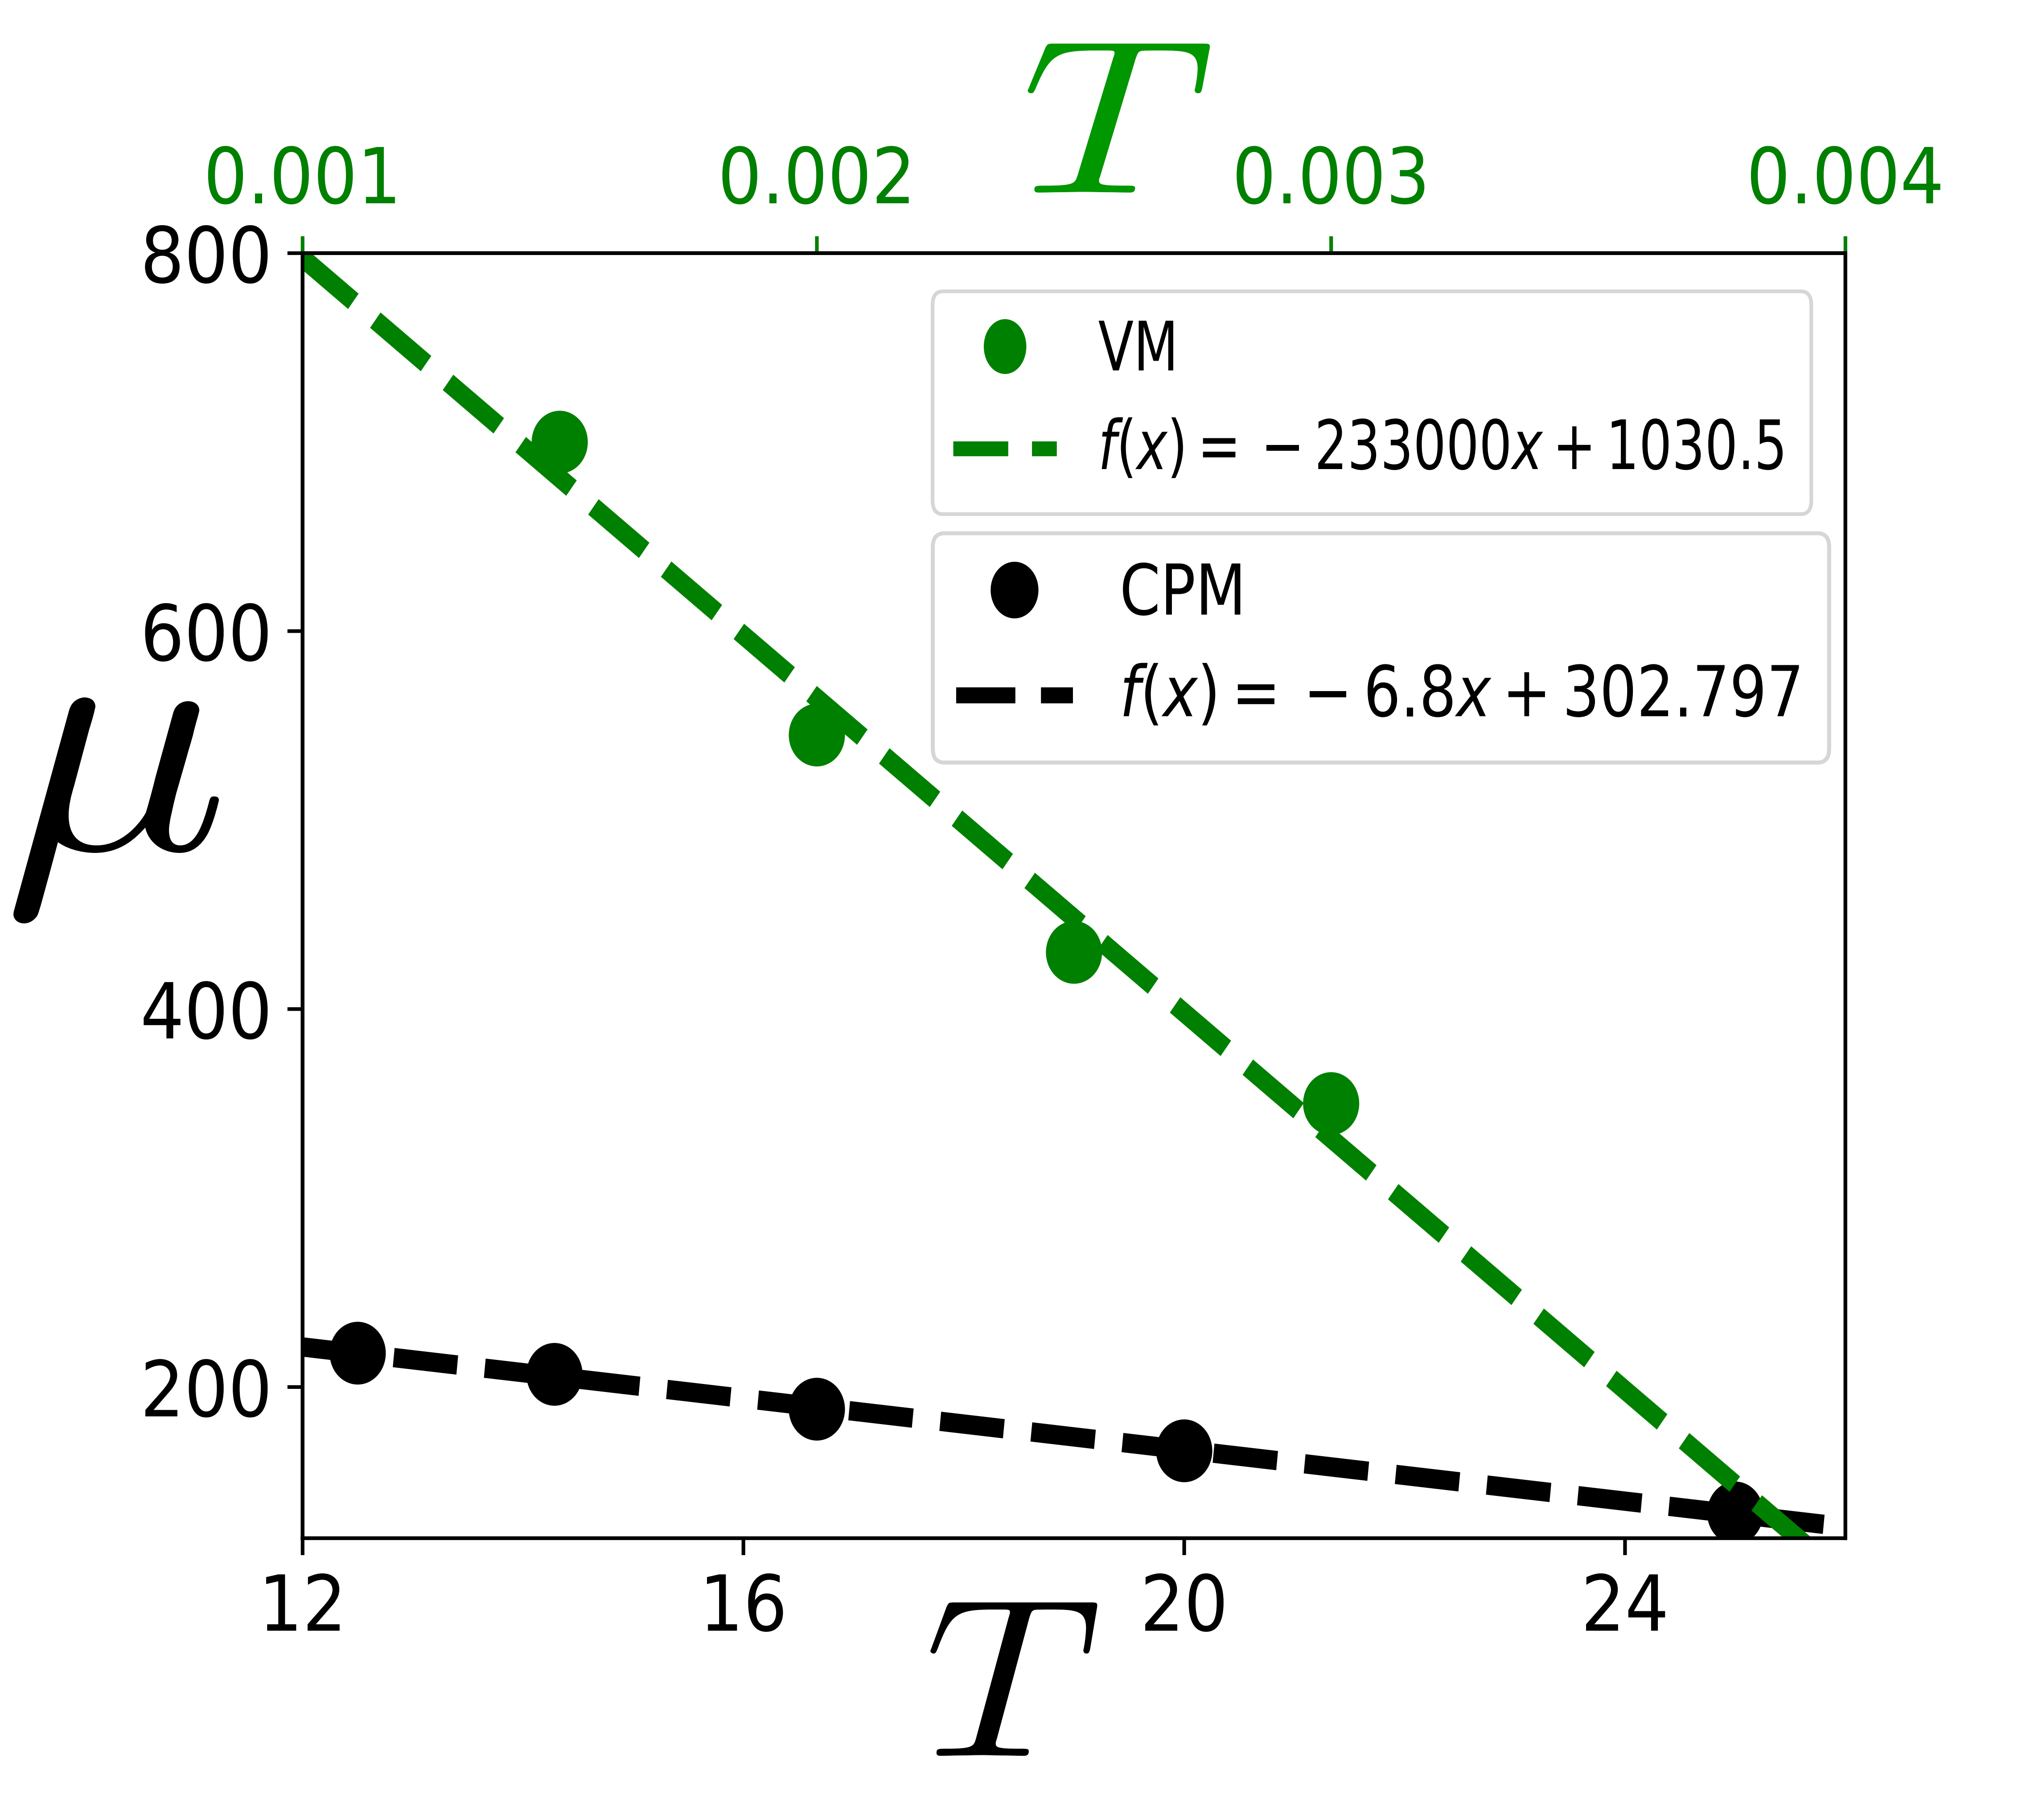

Supplement: supp [file elife-76406-supp-v1.zip › elife_poa_e76406_Figure_2_figure_supplement_4.pdf]

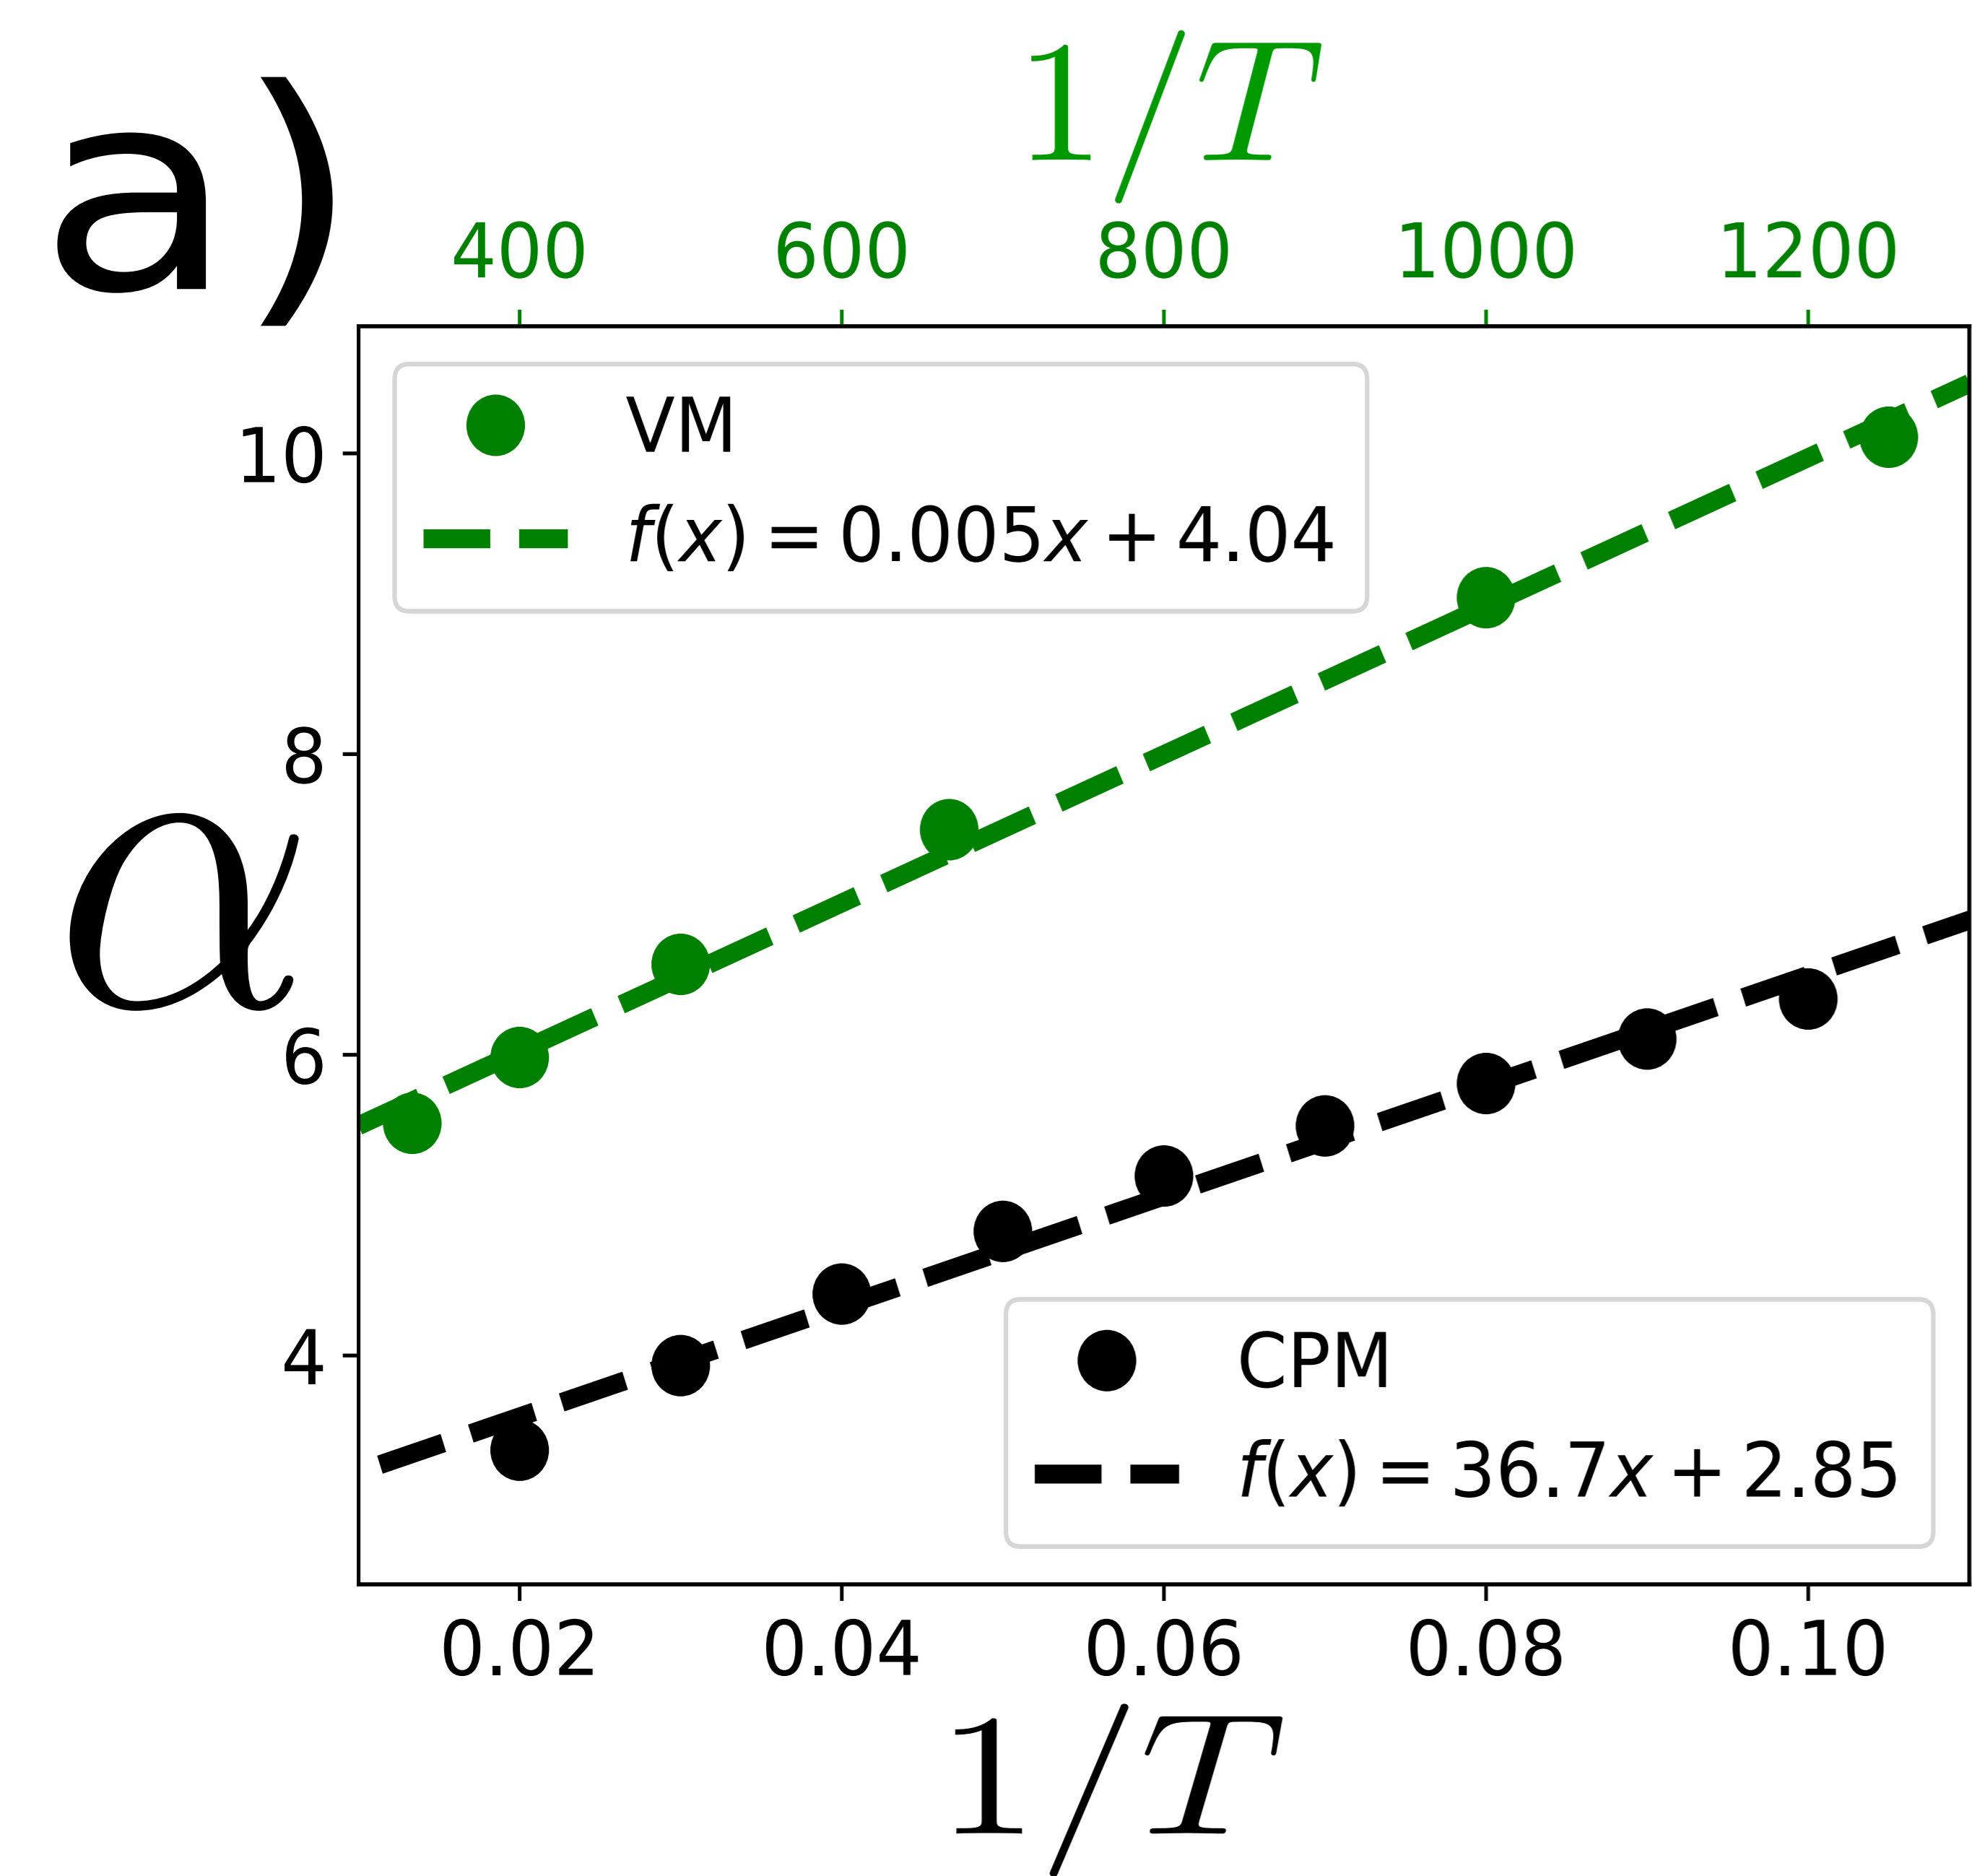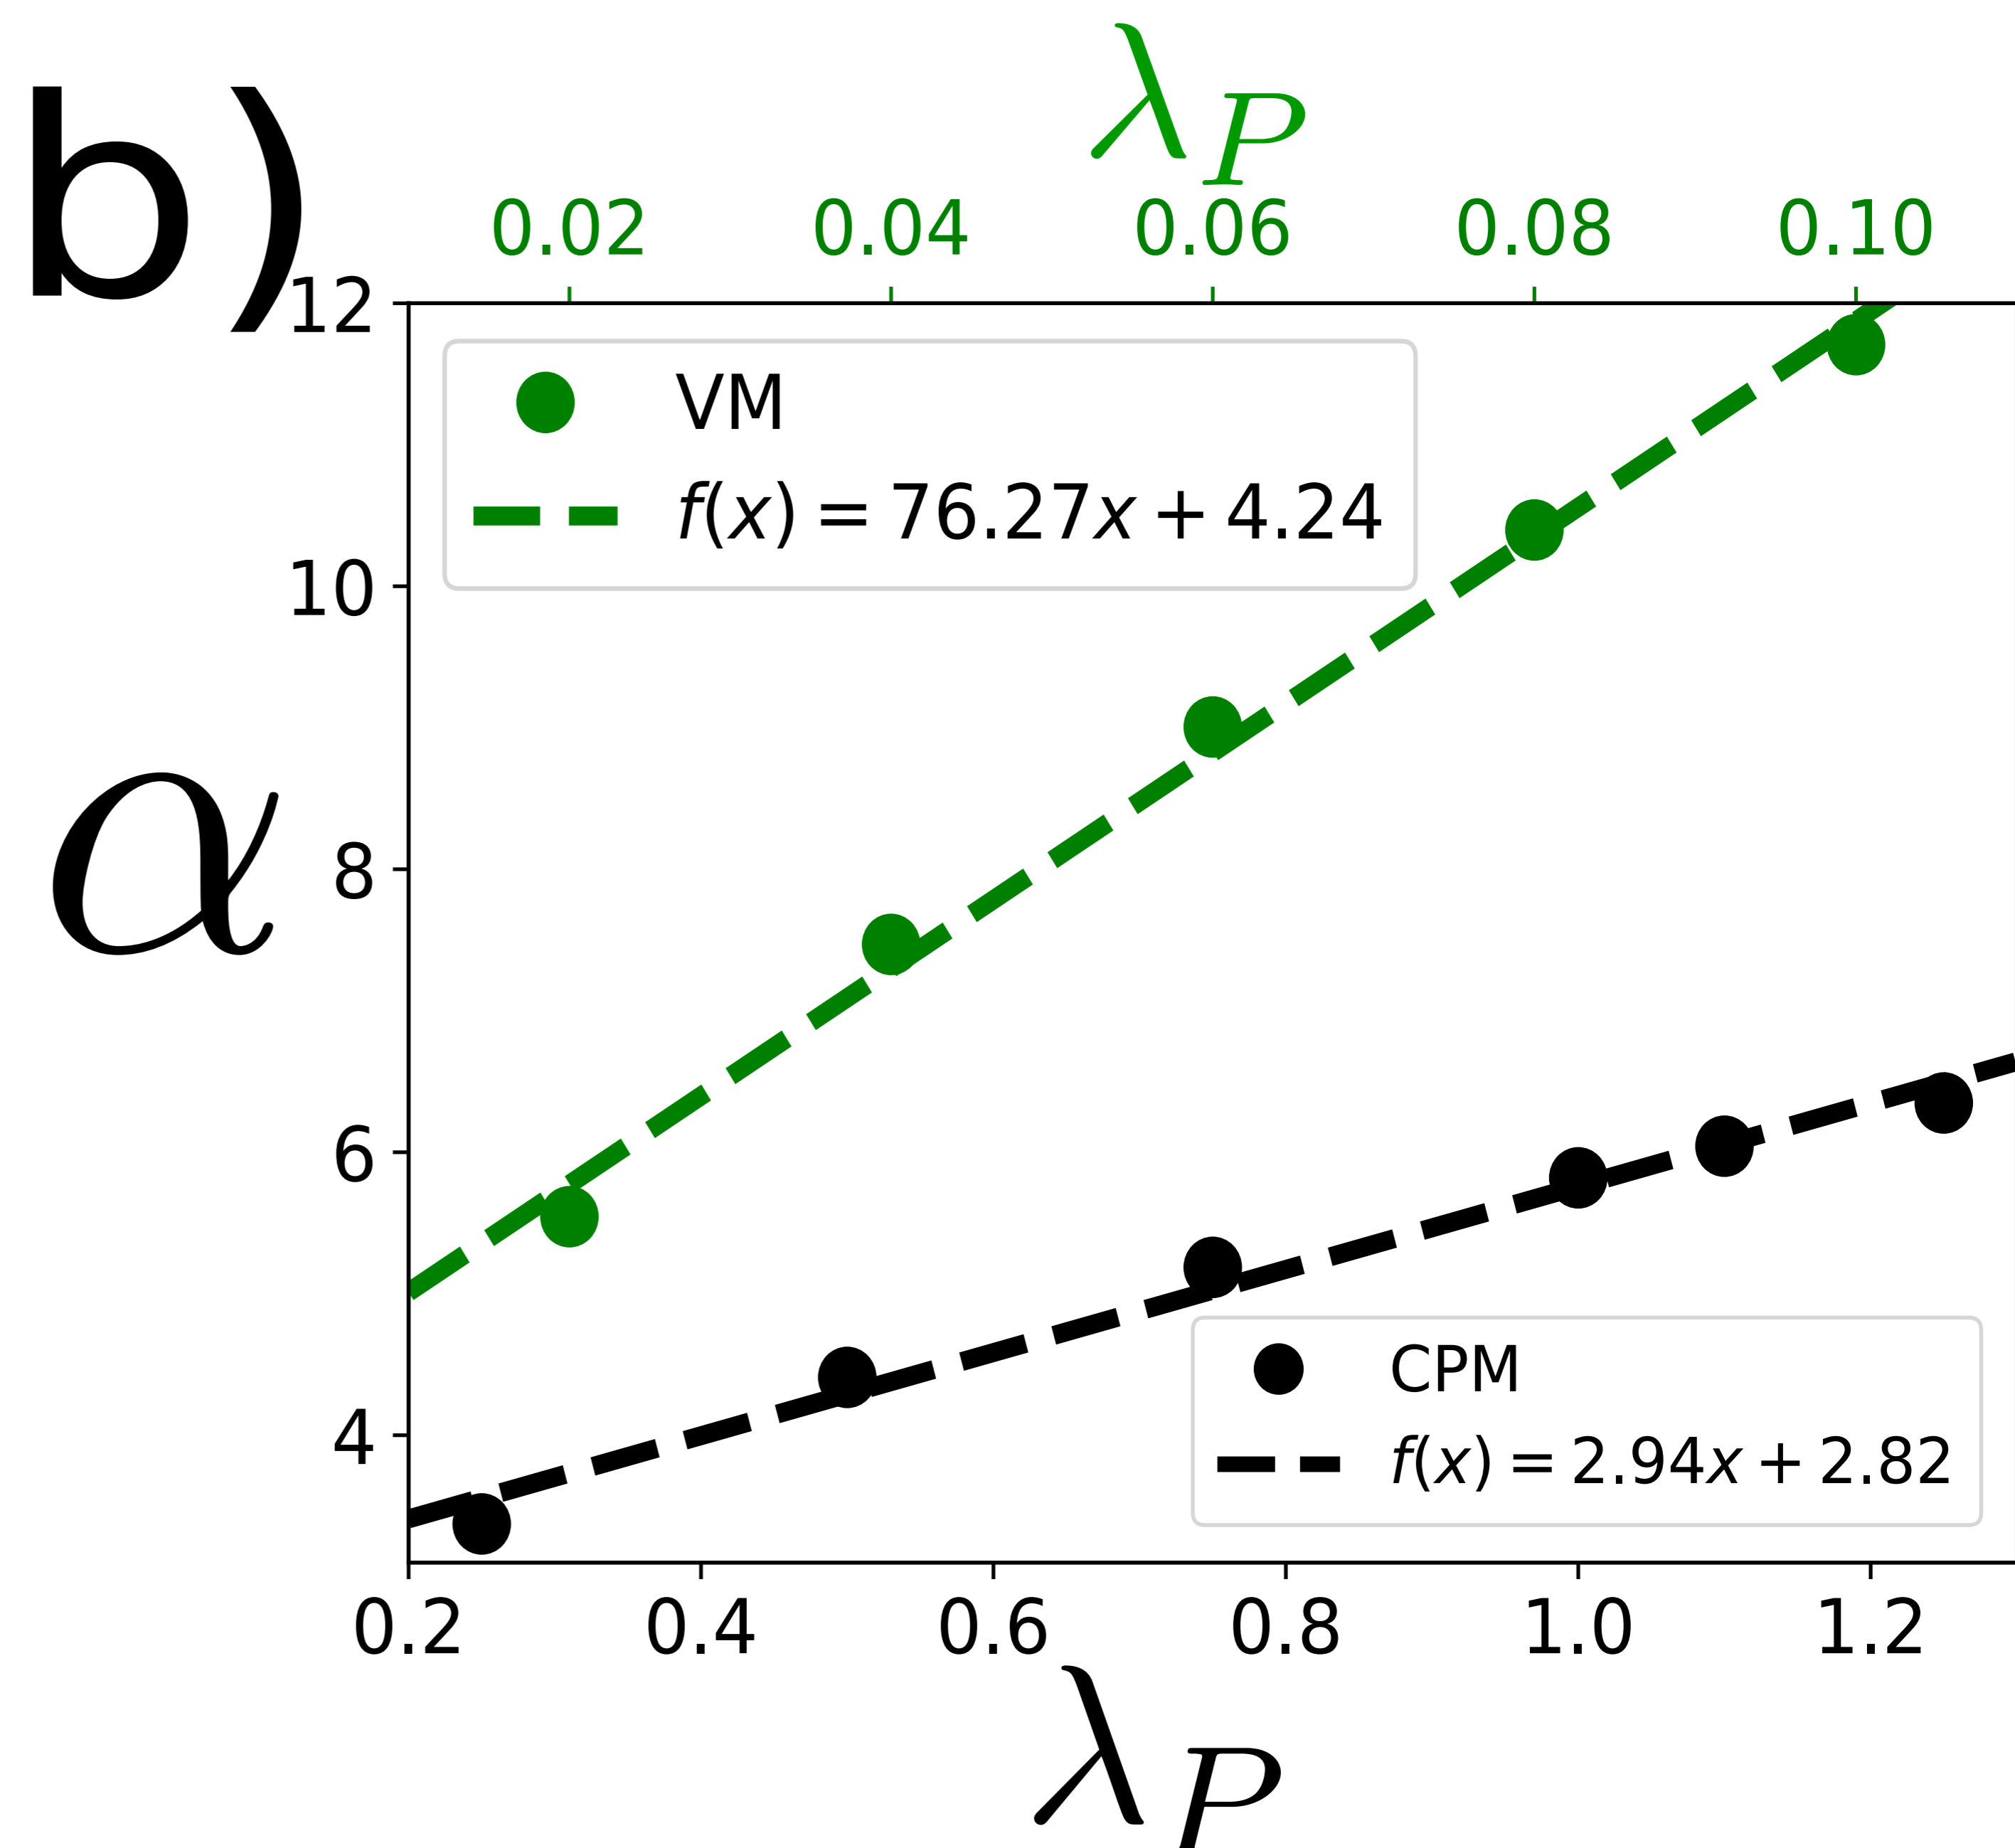

Supplement: supp [file elife-76406-supp-v1.zip › elife_poa_e76406_Figure_3_figure_supplement_2.pdf]

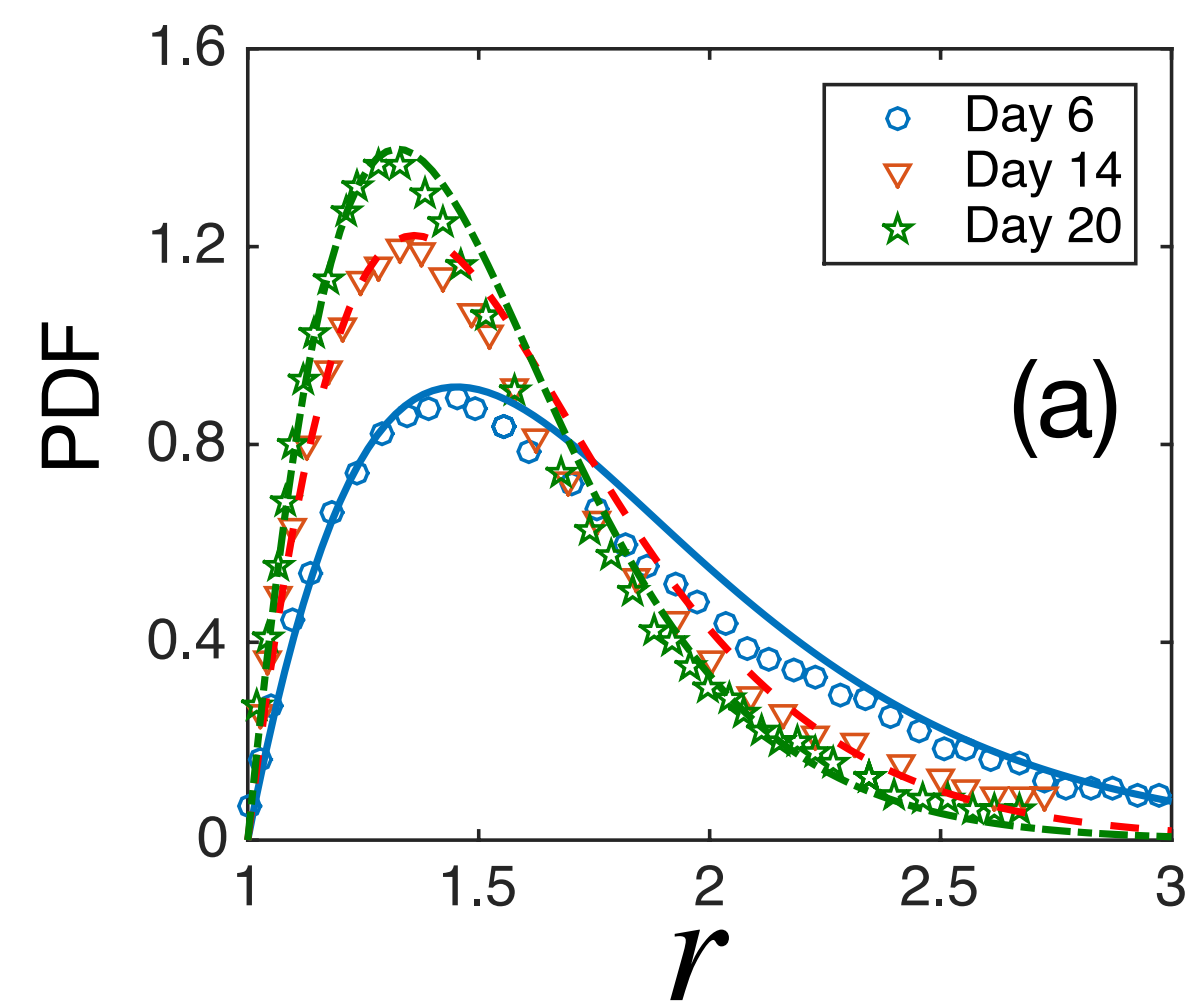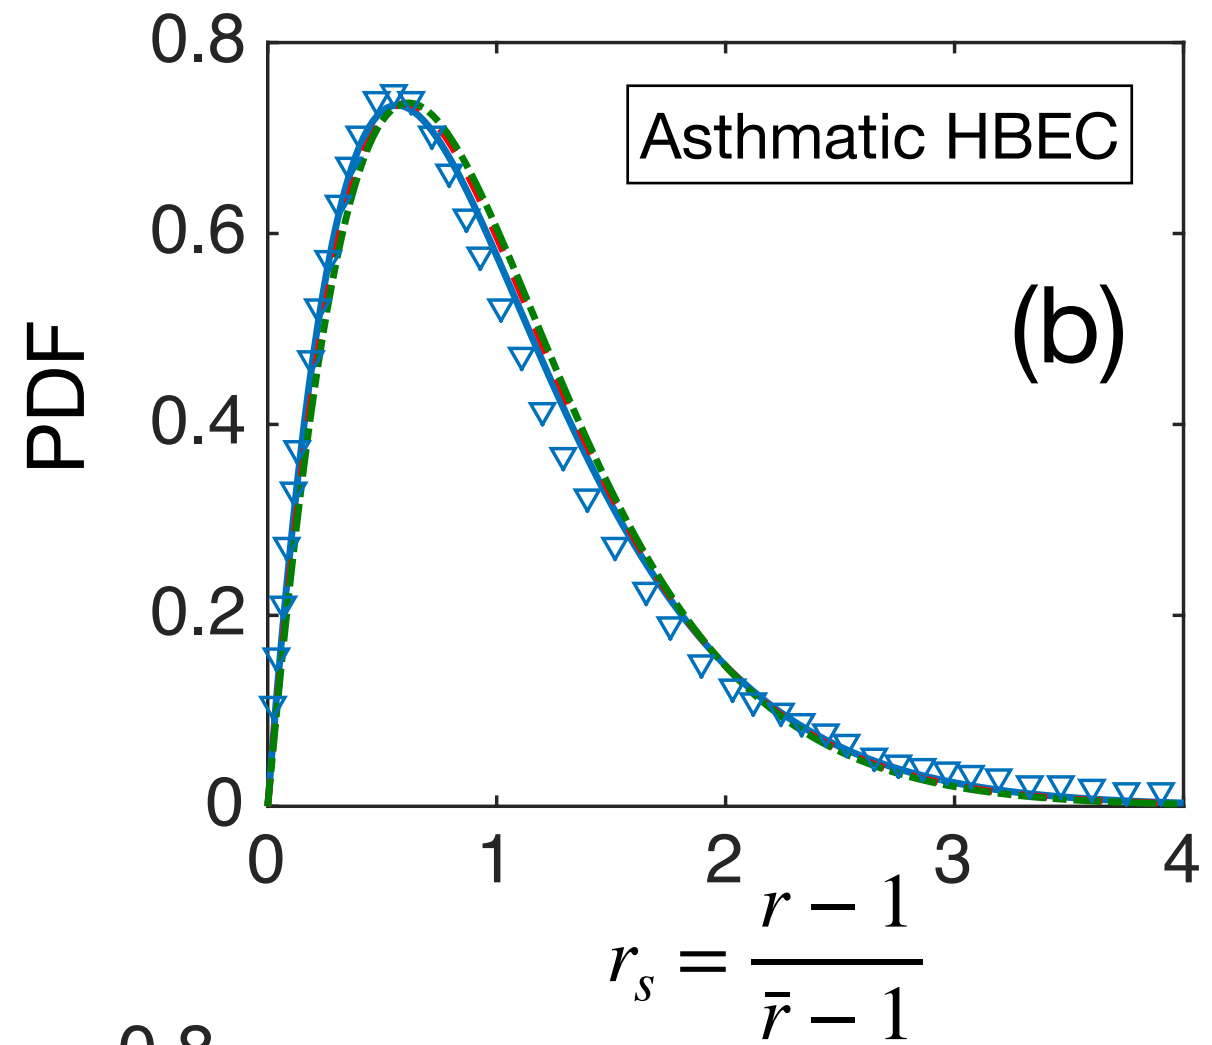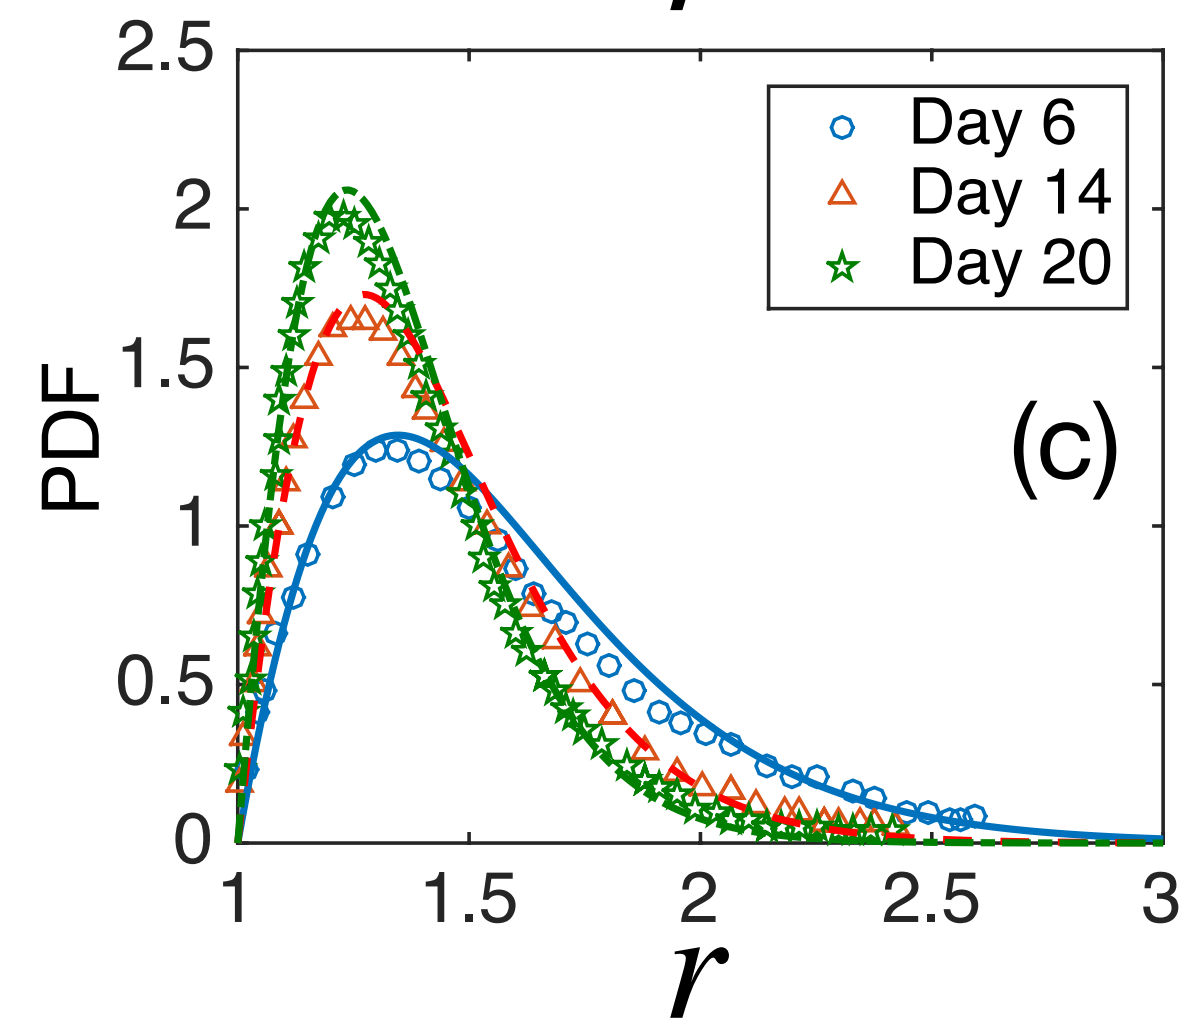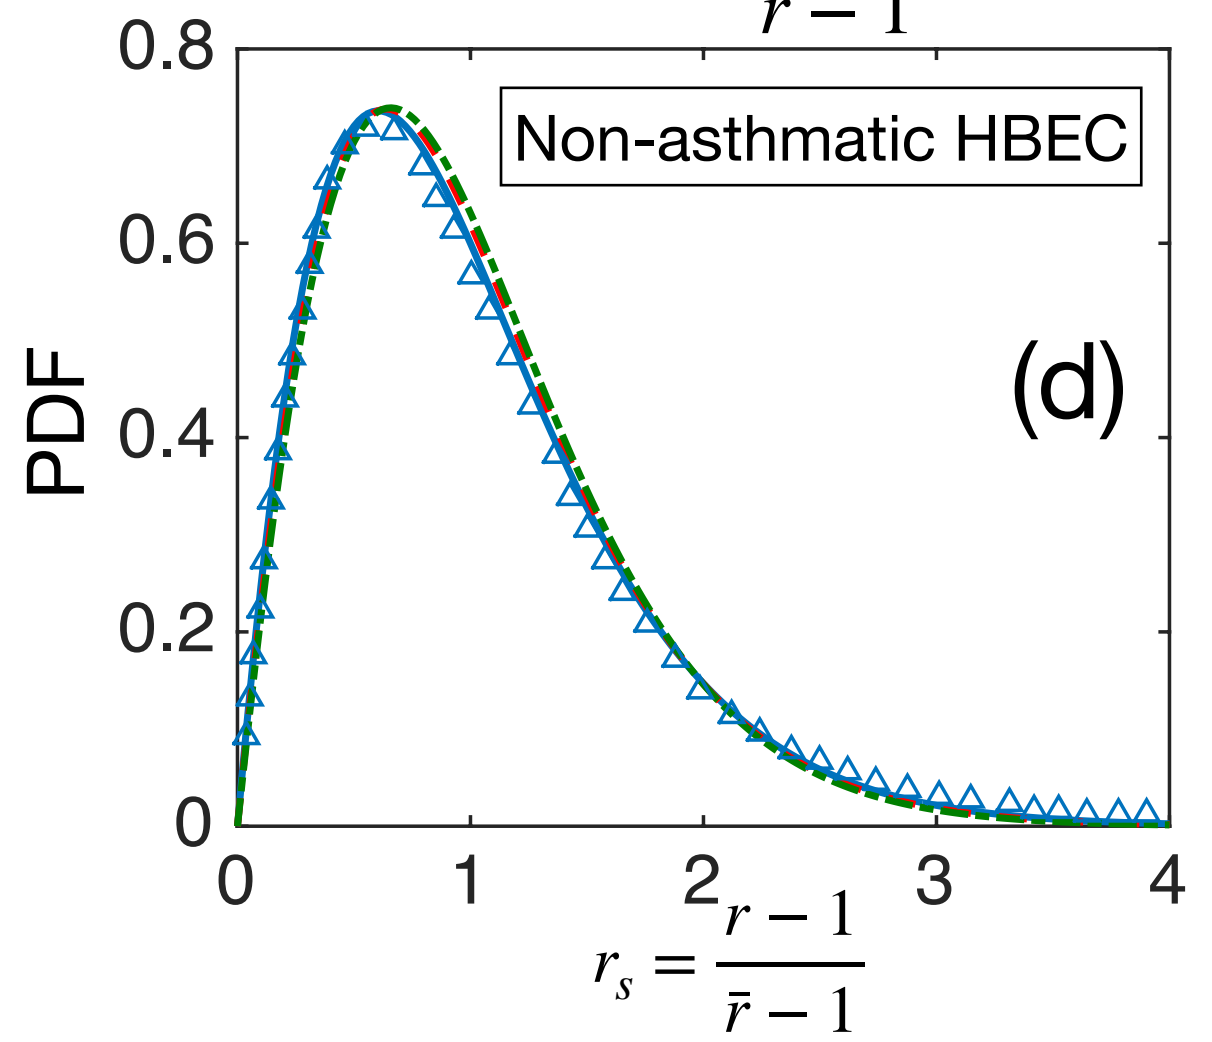

Supplement: supp [file elife-76406-supp-v1.zip › elife_poa_e76406_Figure_4_figure_supplement_1.pdf]
